# Supplementary material for: Radical Dehalogenation and Purine Nucleoside Phosphorylase E. coli: How Does an Admixture of 2′,3′-Anhydroinosine Hinder 2-fluoro-cordycepin Synthesis
Source: PubMed Central journal article supplement (PMC8067715; doi:10.3390/biom11040539), 2021-04-07
Supplement: biomolecules-11-00539-s001.pdf [file biomolecules-11-00539-s001.pdf]

## Supplementary Materials

# Radical Dehalogenation and Purine Nucleoside Phosphorylase *E. coli*: How does an Admixture of 2',3'-Anhydroinosine Hinder 2-fluoro-cordycepin Synthesis

Alexey L. Kayushin <sup>1</sup>, Julia A. Tokunova <sup>1</sup>, Ilja V. Fateev <sup>1</sup>, Alexandra O. Arnautova <sup>1</sup>, Maria Ya. Berzina <sup>1</sup>, Alexander S. Paramonov <sup>1</sup>, Olga I. Lutonina <sup>1</sup>, Elena V. Dorofeeva <sup>1</sup>, Konstantin V. Antonov <sup>1</sup>, Roman S. Esipov <sup>1</sup>, Igor A. Mikhailopulo <sup>2</sup>, Anatoly I. Miroshnikov <sup>1</sup> and Irina D. Konstantinova <sup>1,\*</sup>

| Content                                                                                                                                                               | Page number |
|-----------------------------------------------------------------------------------------------------------------------------------------------------------------------|-------------|
| <b>Figure S1.</b> The HPLC profile of the reaction mixture of 2-fluorocordycepin synthesis                                                                            | S-2         |
| <b>Figure S2.</b> A mass-spectrum of unknown nucleoside ( <b>10</b> )                                                                                                 | S-2         |
| <b>Figure S3.</b> The data of LC-MS 3'-dIno ( <b>9</b> ) with 16% of compound ( <b>11</b> )                                                                           | S-3         |
| <b>Figure S4.</b> The HPLC profile of the reaction mixture obtained during 2-fluorocordycepin synthesis. Synthesis of 2-F-Cord.                                       | S-4         |
| <b>Figure S5.</b> HPLC profile of the reaction mixture obtained during hydrolysis of epoxide <b>11</b> in 5 mM potassium-phosphate buffer (pH 7.0)                    | S-5         |
| <b>Figure S6.</b> HPLC profile of the reaction mixture obtained during hydrolysis of <b>11</b> in 5 mM potassium-phosphate buffer (appeared pH 7.0), D <sub>2</sub> O | S-5         |
| <b>Figure S7.</b> HPLC profile of the reaction mixture obtained during hydrolysis of <b>11</b> in 5 mM potassium-phosphate buffer (appeared pH 4.1), D <sub>2</sub> O | S-5         |
| <b>Figure S8.</b> A fragment of <sup>1</sup> H NMR spectrum of <b>12</b>                                                                                              | S-6         |
| <b>Figure S9.</b> A fragment of <sup>2</sup> H NMR spectrum of nucleoside <b>12</b>                                                                                   | S-6         |
| <b>Figure S10.</b> A fragment of <sup>13</sup> C NMR spectrum of compound <b>12</b>                                                                                   | S-7         |
| <b>NMR data</b> for nucleosides <b>10</b> , <b>11</b> , <b>12</b> , <b>14</b>                                                                                         | S-8 – S-31  |
| The <sup>1</sup> H NMR spectrum of compound <b>13</b> (DMSO-d <sub>6</sub> , 30 °C).                                                                                  | S-32        |

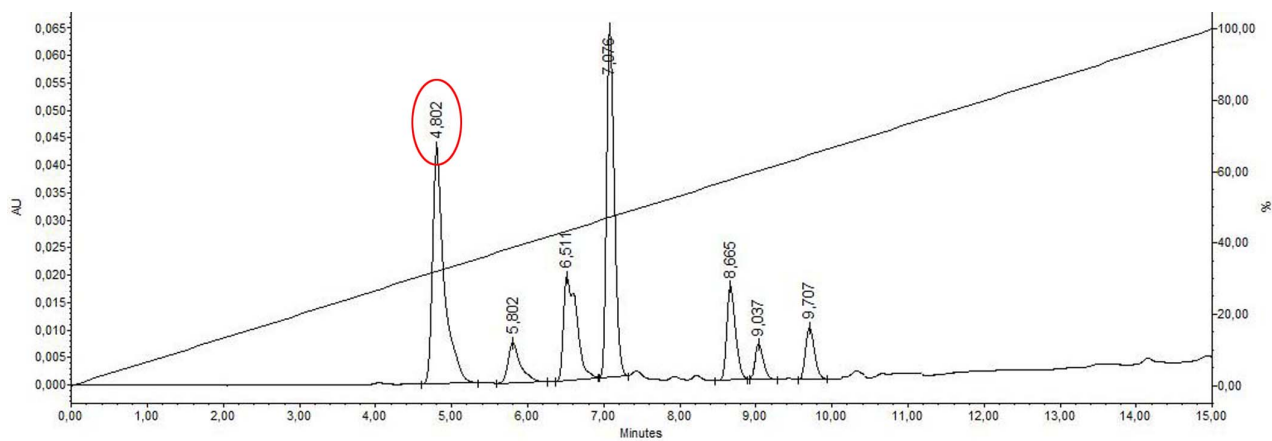

| Comp     | RT (min) | % Area |
|----------|----------|--------|
| ?        | 4.802    | 31.39  |
| Hyp      | 5.802    | 5.45   |
| Ino      | 6.511    | 15.50  |
| 3'-dIno  | 7.076    | 30.40  |
| 2-F-Ade  | 8.665    | 8.93   |
| 2-F-Ado  | 9.037    | 3.23   |
| 2-F-Cord | 9.707    | 5.10   |

**Figure S1.** The HPLC profile of the reaction mixture of anomal 2-fluorocordycepin synthesis (14 days after start of the reaction). Reaction conditions: 1.5 mM 3'-dIno, 1 mM 2-F-Ado, 2 mM potassium phosphate (pH 7.0), 100 mL, 50 ° C, 580 units of PNP.

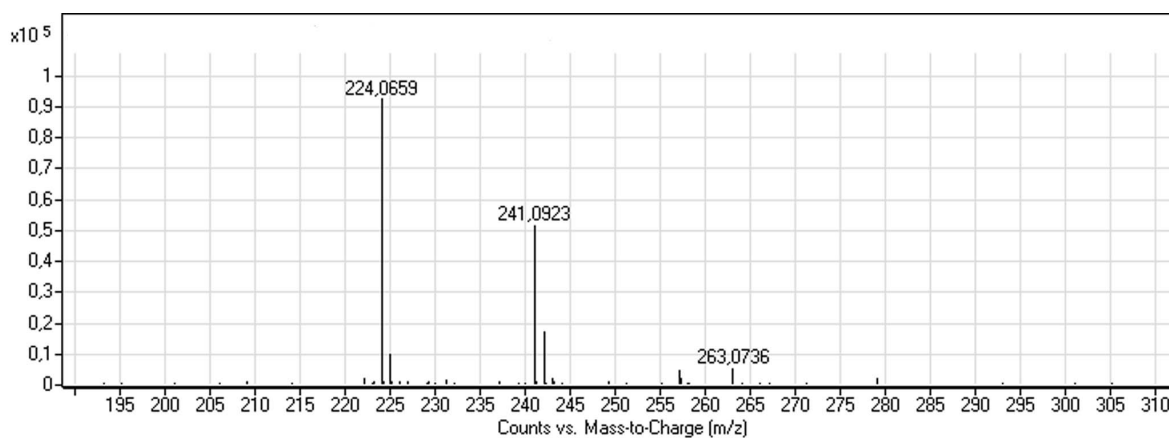

| <b>[M + H]<sup>+</sup> found (calculated)</b>                                      | <b>Other, found (calculated)</b>                                                                           |
|------------------------------------------------------------------------------------|------------------------------------------------------------------------------------------------------------|
| 241.0923 (241.0937, C <sub>9</sub> H <sub>13</sub> N <sub>4</sub> O <sub>4</sub> ) | [M + Na] <sup>+</sup> 263.0736 (263.0756, C <sub>9</sub> H <sub>12</sub> N <sub>4</sub> NaO <sub>4</sub> ) |

**Figure S2.** A mass-spectrum of unknown nucleoside (10) (Figure SI-1, RT = 4.802 min).

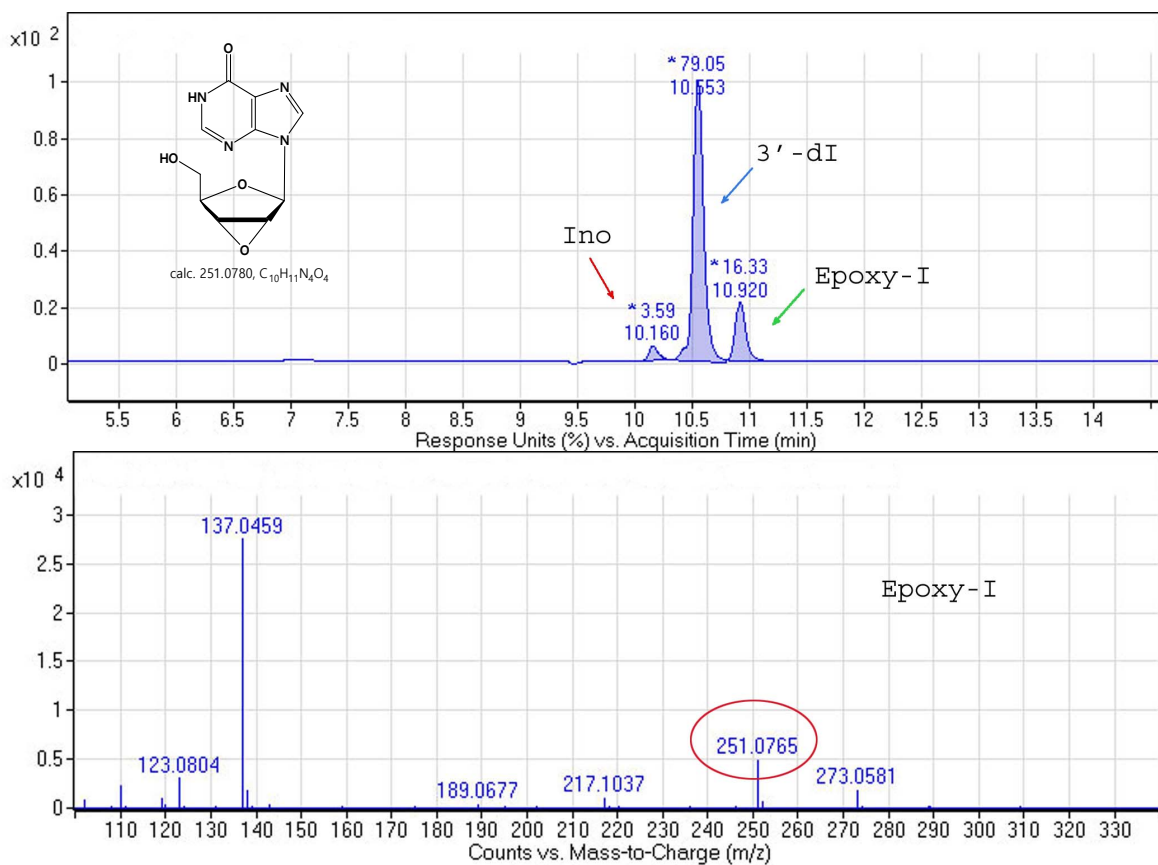

**Figure S3.** The data of LC-MS 3'-dIno (9) with 16% of compound (11) obtained as shown on Scheme 1, route A.

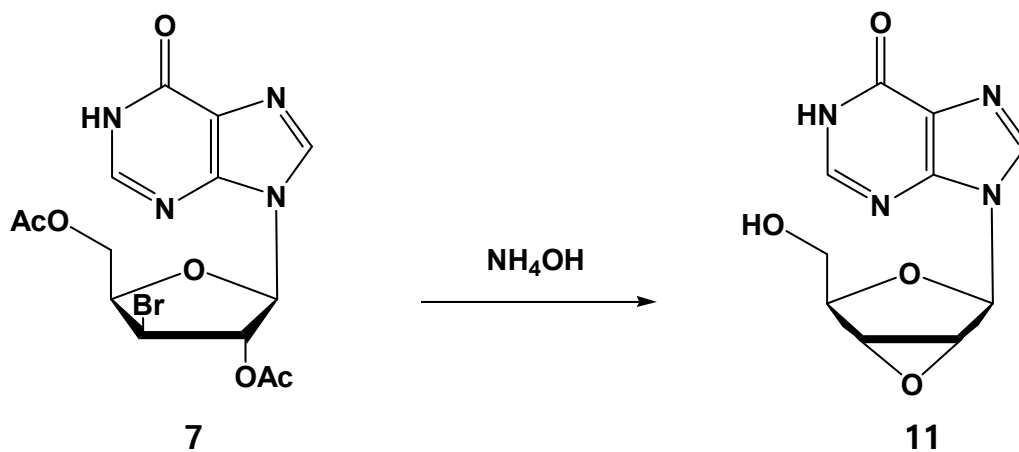

**Scheme 1.** Synthesis of 2',3'-anhydroinosine (11).

## Synthesis of 2-F-Cord.

3'-dIno was obtained using *catalytic dehalogenation* (Scheme 1, route B).

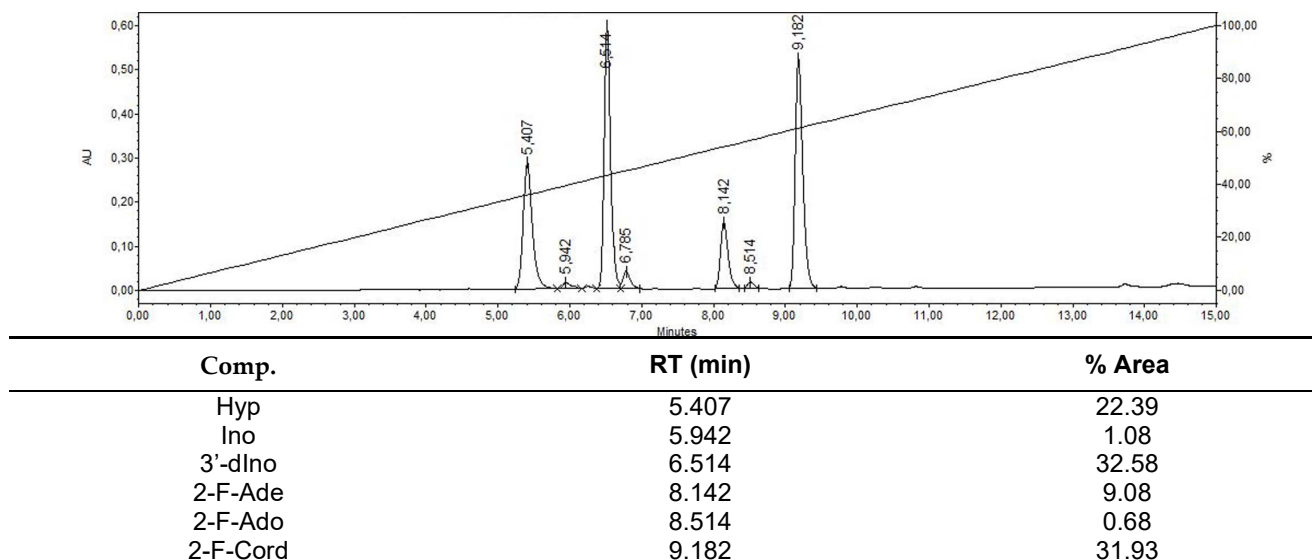

**Figure S4.** The HPLC profile of the reaction mixture obtained during 2-fluorocordycepin synthesis (16 days after start of the reaction). 3'-dIno was obtained using *catalytic dehalogenation* (Scheme 1, route B). Reaction conditions: 1.5 mM 3'-dIno, 1 mM 2-F-Ado, 2 mM potassium phosphate (pH 7.0), 1.0 mL, 50 °C, 12.5 units of PNP.

### 9-(3-Deoxy- $\beta$ -D-ribofuranosyl)-2-fluoroadenine (2-F-Cord)

2-Fluoroadenosine [1] (0.29 g, 1 mmol) was dissolved in 1 L of water under heating and stirring. The solution was cooled to 50 °C, 0.38 g (1.5 mmol) 3'-deoxyinosine **9** and 0.27 g (2 mmol) of  $\text{KH}_2\text{PO}_4$  were added, and the pH of the mixture was adjusted to 7.0; PNP (12500 IU) was added and the reaction mixture was incubated at 52 °C for 20 days under stirring. The desired product was isolated as described above [2]. Yield 193 mg (0.72 mmol, 72%) as lyophilized powder; purity 99.78 % ( $R_t = 9.18$  min, method II). UV ( $\text{H}_2\text{O}$ , pH 7.0)  $\lambda_{\text{max}}$ , nm ( $\epsilon$ ,  $\text{M}^{-1}\text{cm}^{-1}$ ): 261 (14800);  $\lambda_{\text{min}}$ , nm ( $\epsilon$ ,  $\text{M}^{-1}\text{cm}^{-1}$ ): 225 (5100). ESI-MS data,  $^1\text{H}$  and  $^{13}\text{C}$  NMR spectra were described in [2].

- 1 V.B. Berzin, et all. The preparative method for 2-fluoroadenosine synthesis. *Russ. J. Bioorg. Chem.* **2009**, 35 (2), 193–196; doi:10.1134/S1068162009020071
- 2 A.O. Denisova, et all. The chemoenzymatic synthesis of 2-chloro- and 2-fluorocordycepins. *Synthesis*, **2017**, 49, 4853–4860.

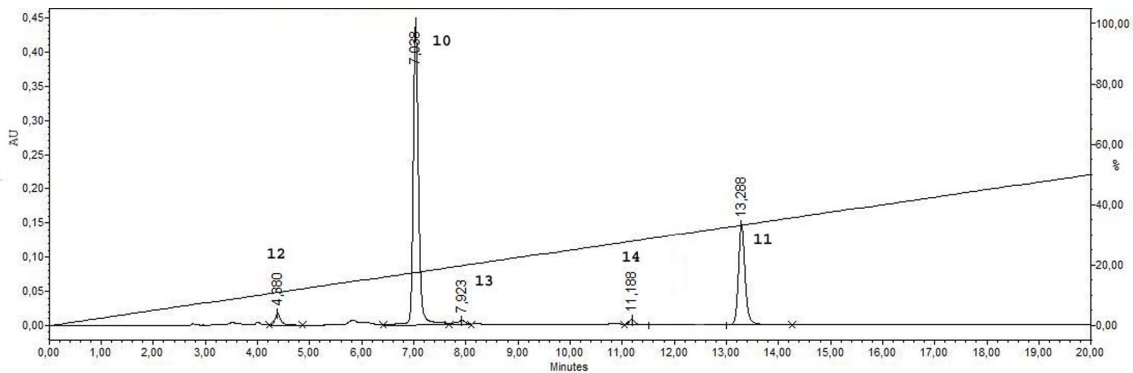

**Figure S5.** HPLC profile of the reaction mixture obtained during hydrolysis of epoxide **11** in 5 mM potassium-phosphate buffer (pH 7.0), 96 h after reaction start, detection at 260 nm.

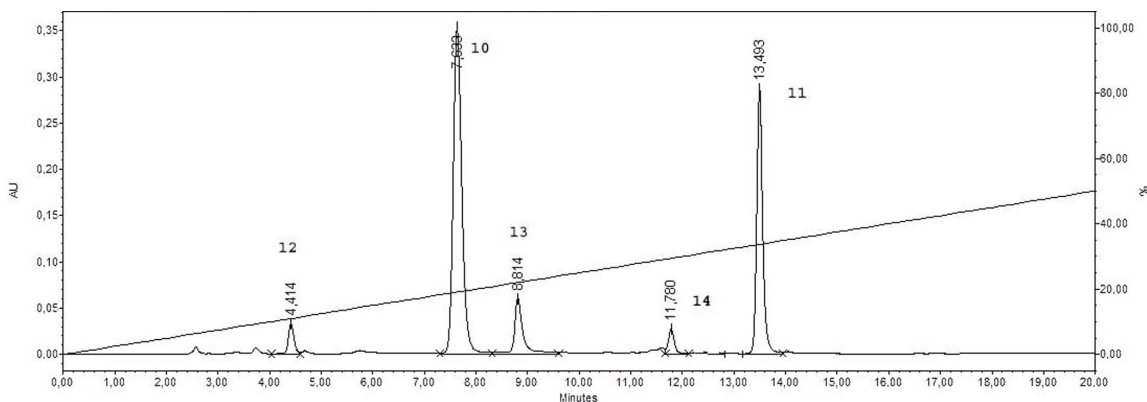

**Figure S6.** HPLC profile of the reaction mixture obtained during hydrolysis of **11** in 5 mM potassium-phosphate buffer (appeared pH 7.0), D<sub>2</sub>O, 96 h after reaction start, detection at 260 nm.

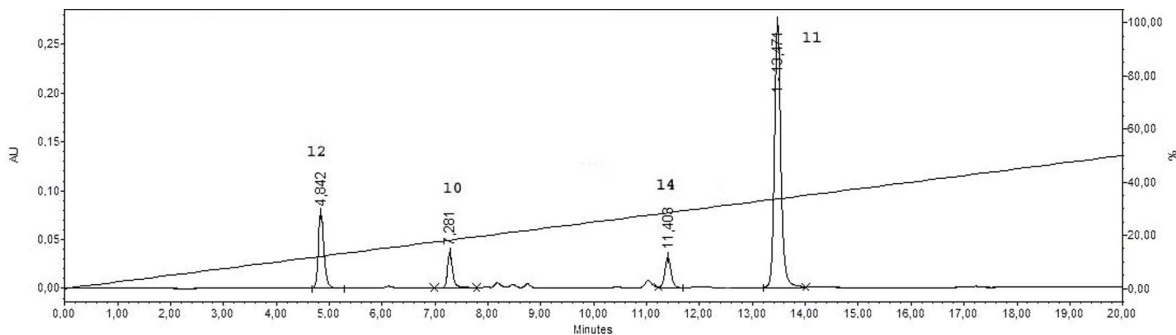

**Figure S7.** HPLC profile of the reaction mixture obtained during hydrolysis of **11** in 5 mM potassium-phosphate buffer (appeared pH 4.1), D<sub>2</sub>O, 96 h after reaction start, detection at 260 nm.

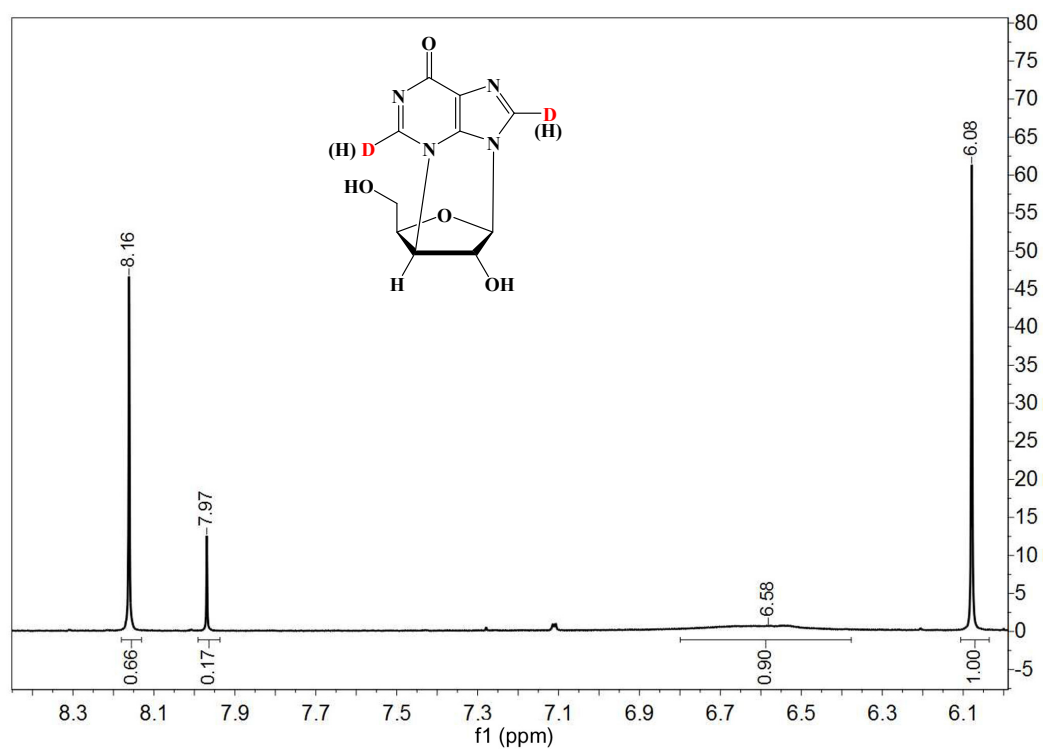

**Figure S8.** A fragment of <sup>1</sup>H NMR spectrum of **12**.

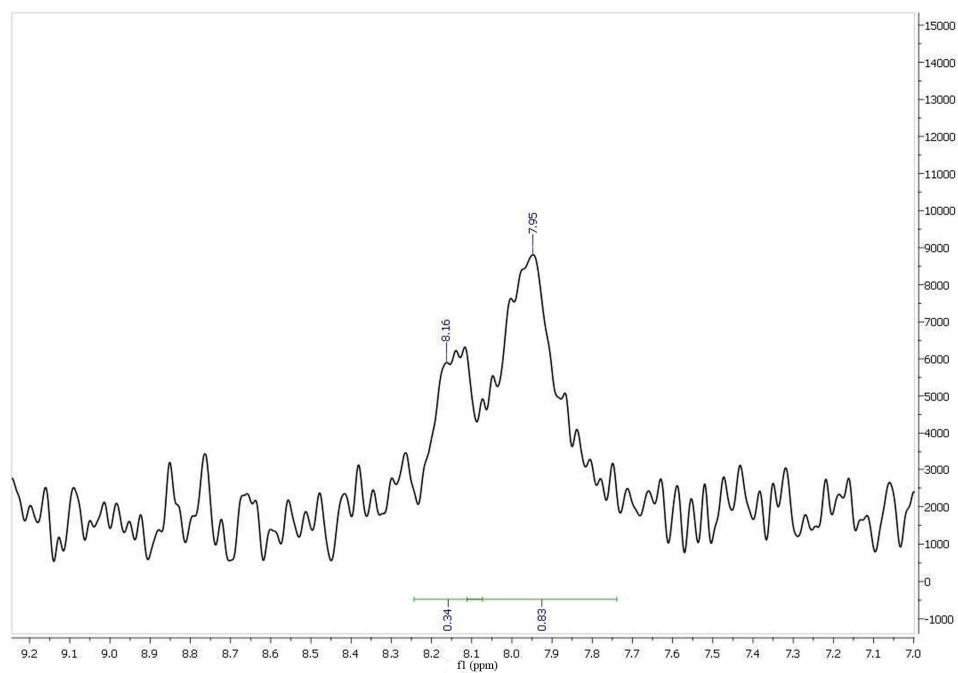

**Figure S9.** A fragment of <sup>2</sup>H NMR spectrum of nucleoside **12**.

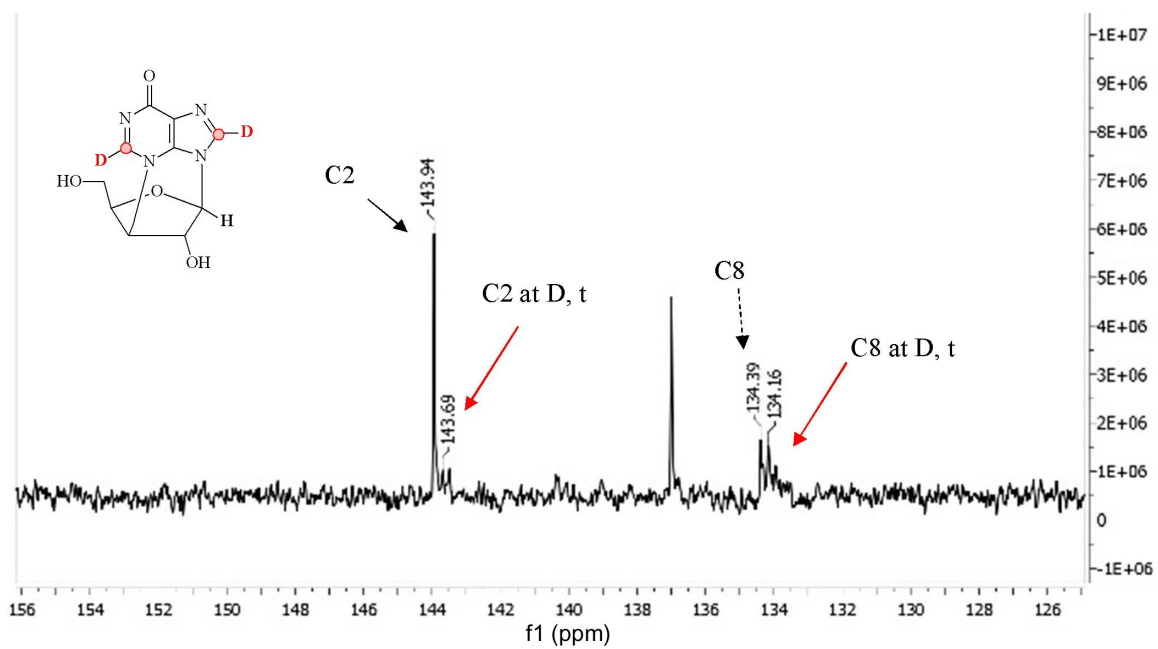

Figure S10. A fragment of  $^{13}\text{C}$  NMR spectrum of compound 12.

## NMR data

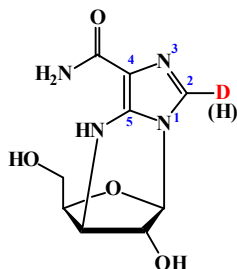

**Nucleoside 10:** HPLC:  $R_t = 7.38$  min, purity 96.6%. UV/Vis ( $D_2O$ , appeared pH 4.1):  $\lambda_{max}$ , nm ( $\epsilon$ ,  $M^{-1}cm^{-1}$ ): 276 (14900),  $\lambda_{min}$ , nm ( $\epsilon$ ,  $M^{-1}cm^{-1}$ ): =222 (2900). HRMS (ESI): ( $m/z$ ) [( $M + H$ ) $^+$ ] - calculated for  $C_9H_{13}N_4O_4$  241.0931, found 241.0955; calculated for  $C_9H_{12}DN_4O_4$  242.0994, found 242.1026.

$^1H$  NMR (700 MHz,  $DMSO-d_6$ , 30 °C):  $\delta = 7.12$  (s, 0.18 H, H-8), 6.69 and 6.61 (2 s, 2 H,  $CONH_2$ ), 6.39 (d,  $J = 4.4$  Hz, 1 H, NH), 5.57 (d,  $J < 0.5$  Hz, 1H, H-1'), 4.71 (br. sign, 0.36 H, OH-5'), 4.48 (br. sign, 1H, H-2'), 4.25 (dt,  $J = 3.2, 6.6, 6.6$  Hz, 1 H, H-4'), 3.70 (m, 1 H, H-3'), 3.54 (dd,  $J = 7.0, 11.3$  Hz, 1 H, CH-5'a), 3.46 ppm (dd,  $J = 6.5, 11.3$  Hz, 1 H, CH-5'b).

$^2H$  NMR (700 MHz,  $DMSO-d_6$ , 30 °C):  $\delta = 7.12$  ppm (s, D-8).

$^{13}C$  NMR (176 MHz,  $DMSO-d_6$ , 30 °C):  $\delta = 165.46$  (C=O), 139.19 (C5), 127.03(C2), 126.79 (t,  $J = 18.5$ Hz, C2-D), 110.91 (C4), 85.14 (C4'), 83.96 (C1'), 73.09 (C2'), 60.07 (C5'), 56.16 ppm (C3').

$^{15}N$  NMR (71 MHz,  $DMSO-d_6$ , 30 °C):  $\delta = 253.35$  (N3), 177.94 (N1), 95.31 ( $NH_2$ ), 56.88 ppm (NH).

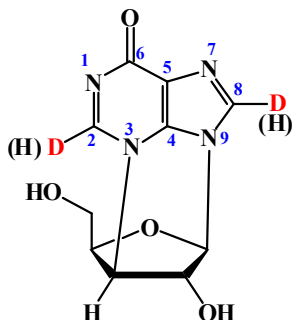

**Nucleoside 12:** HPLC:  $R_t = 5.01$  min, purity 100%. UV/Vis ( $D_2O$ , appeared pH 4.1):  $\lambda_{max}$ , nm ( $\epsilon$ ,  $M^{-1}cm^{-1}$ ): 254 (9900),  $\lambda_{min}$ , nm ( $\epsilon$ ,  $M^{-1}cm^{-1}$ ): =229 (3500). HRMS (ESI): ( $m/z$ ) [( $M + H$ ) $^+$ ] - calculated for  $C_{10}H_{11}N_4O_4$  251.0775, found 251.0797; calculated for  $C_{10}H_{10}DN_4O_4$  252.0838, found 252.0868; calculated for  $C_{10}H_9D_2N_4O_4$  253.0900, found 253.0914.

$^1H$  NMR (700 MHz,  $DMSO-d_6$ , 30 °C):  $\delta = 8.16$  (s, 0.66 H, H-8), 7.97 (s, 0.18 H, H-2), 6.08 (1H, d,  $J < 1$  Hz, H-1'), 5.07 (d,  $J = 3.1$  Hz, 1 H, H-3'), 4.85 (m, 1 H,  $J < 1$  Hz, H-2'), 4.62 (ddd,  $J = 3.4, 6.1, 7.5$  Hz, 0, 1 H, H-4'), 3.41 (dd,  $J = 6.1, 11.1$  Hz, 1 H, CH-5'a), 2.98 ppm (dd,  $J = 7.6, 11.1$  Hz, 1 H, CH-5'b).

$^2H$  NMR (700 MHz,  $DMSO-d_6$ , 30 °C):  $\delta = 8.16$  (s, 0.34 H, D-8), 7.97 ppm (s, 0.82 H, D-2).

$^{13}C$  NMR (176 MHz,  $DMSO-d_6$ , 30 °C):  $\delta = 163.36$  (C=O), 143.94 (C2), 136.99 (C4), 134.39 (C8), 134.16 (t,  $J = 38$  Hz, C8-D), 120.27 (C5), 85.36 (C1'), 84.29 (C4'), 73.49 (C2'), 61.07 (C3'), 59.09 ppm (C5').

$^{15}N$  NMR (71 MHz,  $DMSO-d_6$ , 30 °C):  $\delta = 265.97$  (N1), 252.28 (N7), 174.85 (N9), 135.43 ppm (N3).



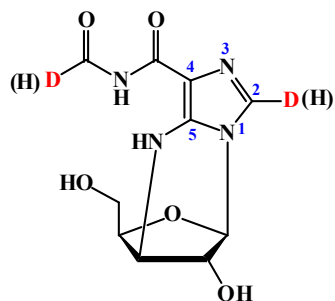

**Nucleoside 14:** HPLC: RT 11.48, purity 98.1%. UV/Vis (D<sub>2</sub>O, appeared pH 4.1):  $\lambda_{\max}$ , nm ( $\epsilon$ , M<sup>-1</sup>cm<sup>-1</sup>): 215(17600), 310 (15000),  $\lambda_{\min}$ , nm ( $\epsilon$ , M<sup>-1</sup>cm<sup>-1</sup>): 264 (1800). HRMS (ESI): (*m/z*) [(M + H)<sup>+</sup>] - calculated for C<sub>10</sub>H<sub>13</sub>N<sub>4</sub>O<sub>5</sub> 269.0880, found 269.0896; calculated for C<sub>10</sub>H<sub>12</sub>DN<sub>4</sub>O<sub>5</sub> 270.0943, found 270.0972; calculated for C<sub>10</sub>H<sub>11</sub>D<sub>2</sub>N<sub>4</sub>O<sub>5</sub> 271.1006, found 271.1035.

<sup>1</sup>H NMR (700 MHz, DMSO-d<sub>6</sub>, 30 °C):  $\delta$  = 10.11 (s, 1 H, CO-NH), 9.11 (s, 0.1 H, C(O)H), 7.28 (s, 0.19 H, H-2), 7.11 (d, *J* = 4.7 Hz, 1H, C5-NH), 6.03 (s, 1 H, OH-2'), 5.63 (br. d, *J* = 0.25 Hz, H-1'), 4.74 (br. sign, 1 H, OH-5'), 4.32 (dt, *J* = 3.3, 6.7, 6.7 Hz, 1 H, H-4'), 3.77 (m, 1 H, H-3'), 3.56 (dd, *J* = 6.7, 11.3 Hz, 1 H, H<sub>5'a</sub>), 3.49 ppm (dd, *J* = 6.9, 10.8 Hz, 1 H, H<sub>5'b</sub>).

<sup>2</sup>H NMR (700 MHz, DMSO-d<sub>6</sub>, 30 °C):  $\delta$  = 9.11 (s, 0.9 H, C(O)H), 7.28 ppm (s, 0.91 H, D-2).

<sup>13</sup>C NMR (176 MHz, DMSO-d<sub>6</sub>, 30 °C):  $\delta$  = 162.29 (s, 0.1C, (C=O)H), 162.09 (t, *J* = 30.1 Hz, 0.1C, (C=O)H), 161.74 (s, 1C, C=O), 143.29 (C5), 128.87 (s, 0.19C, C2-H), 128.66 (t, *J* = 33.2 Hz, 0.81C, C2-D), 108.65 (C4), 85.87 (C4'), 84.02 (C1'), 72.57 (C2'), 60.10 (C5'), 55.97 ppm (C3'). <sup>15</sup>N NMR (71 MHz, DMSO-d<sub>6</sub>, 30 °C):  $\delta$  = 250.33 (N3), 179.25 (N1), 158.81 (CO-NH), 64.28 ppm (C5-NH).

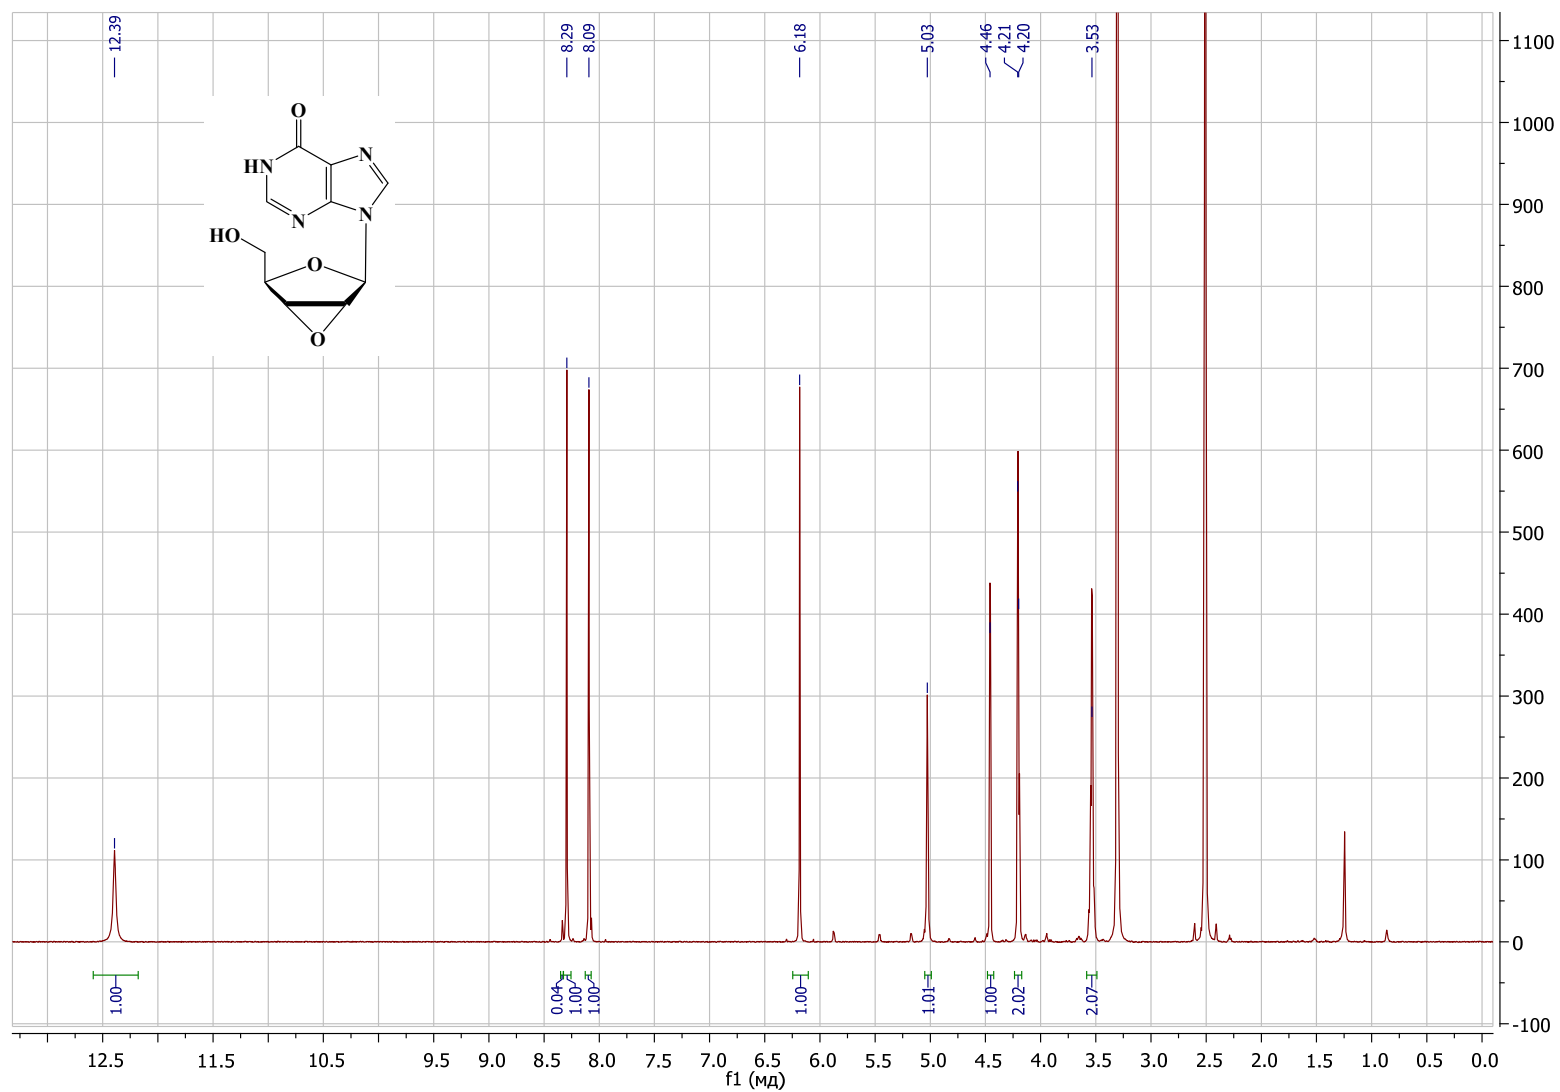

The <sup>1</sup>H NMR spectrum of 2',3'-anhydroinosine **11** (DMSO-d<sub>6</sub>, 30 °C).

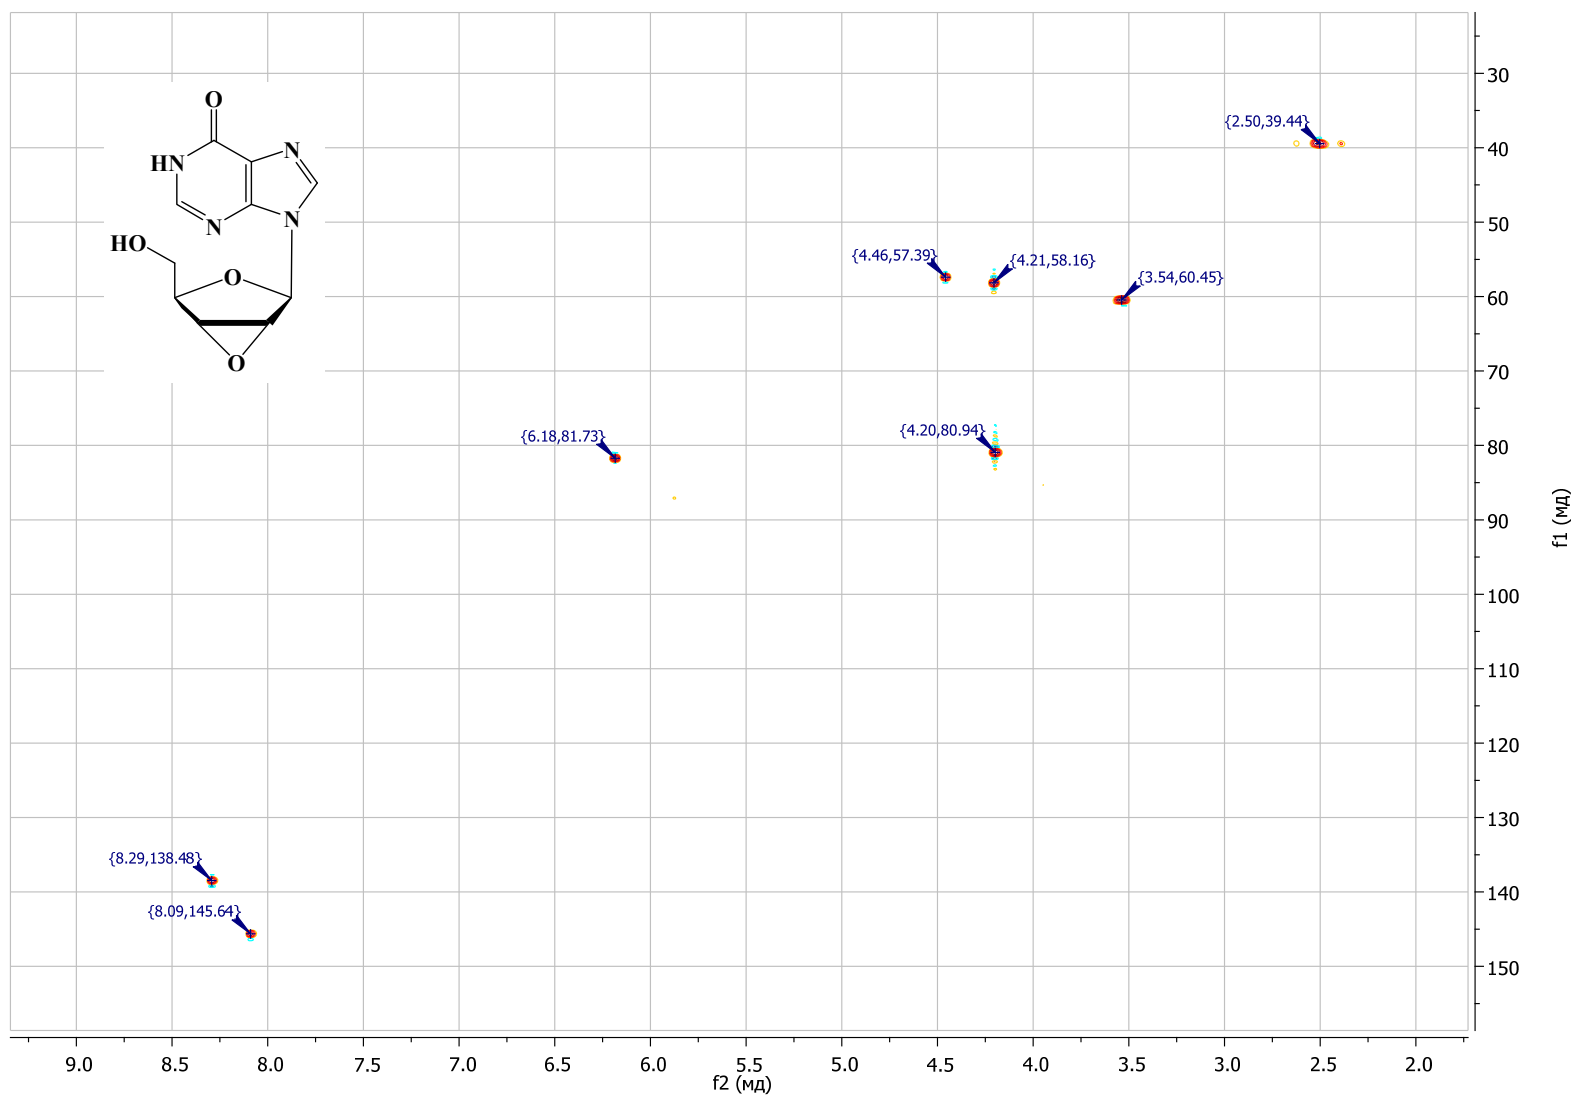

The  $^1\text{H}$ - $^{13}\text{C}$ -HSQC NMR spectrum of 2',3'-anhydroinosine 11 (DMSO- $d_6$ , 30 °C).

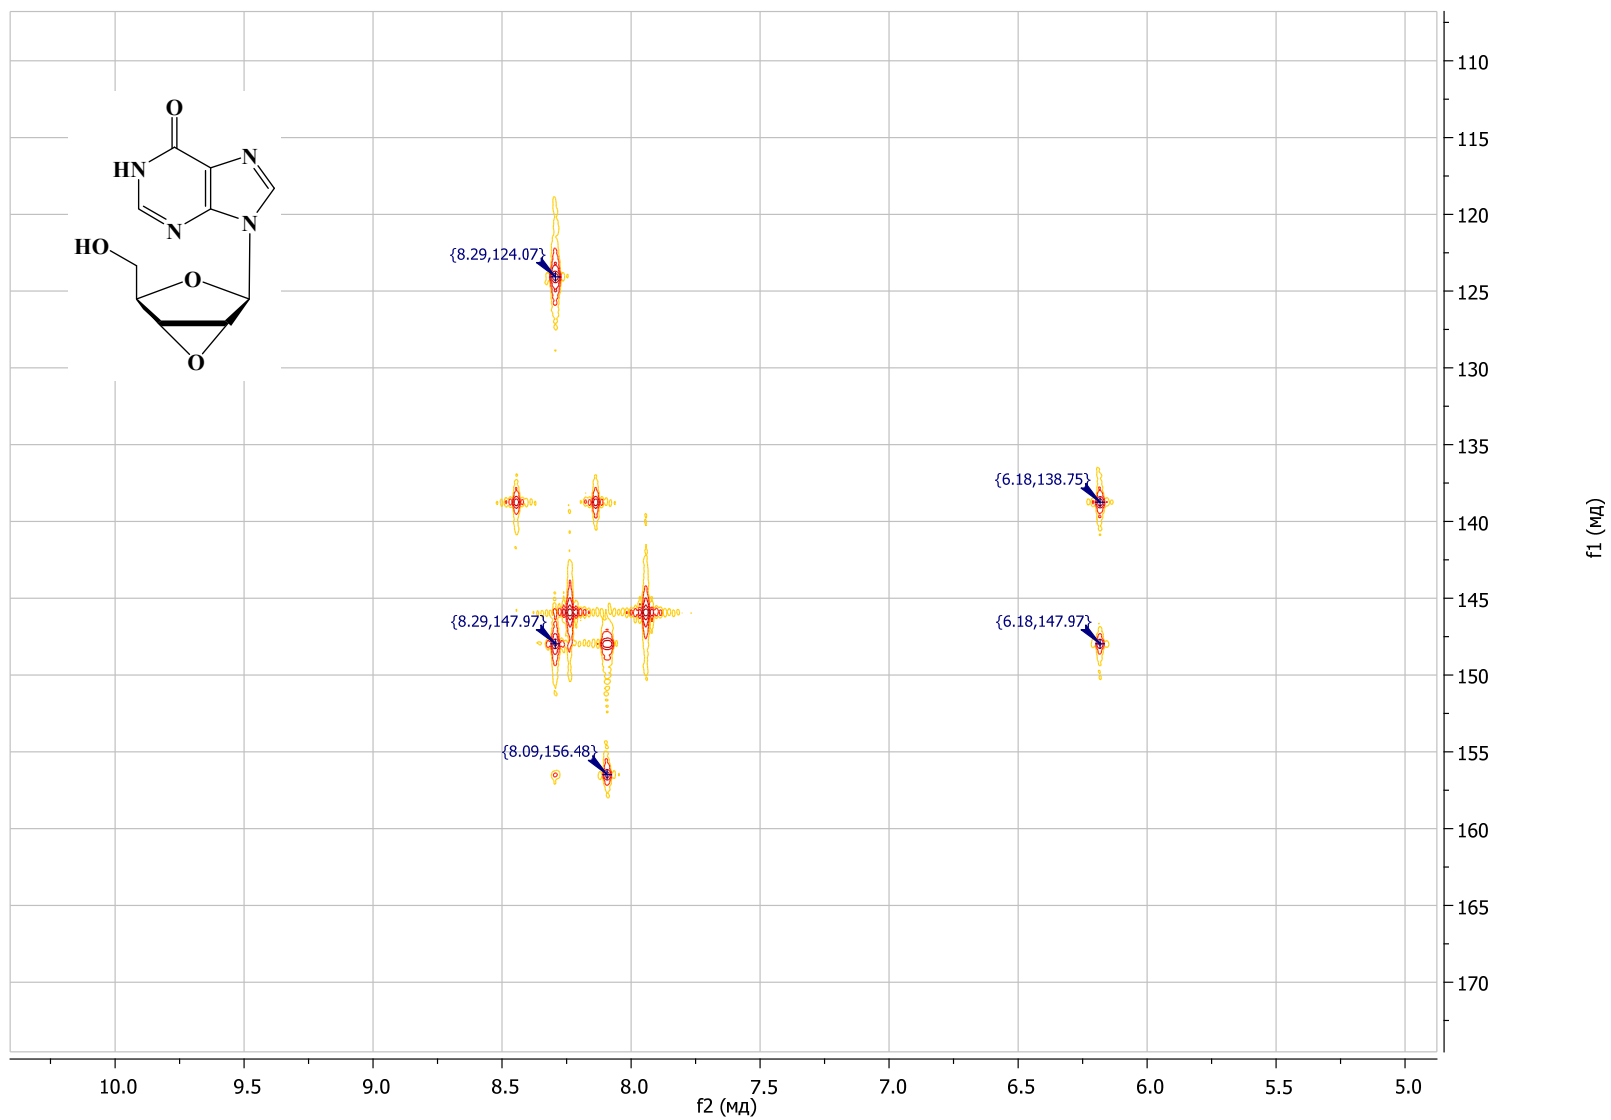

The fragment of  $^1\text{H}$ - $^{13}\text{C}$ -HMBC NMR spectrum of 2',3'-anhydroinosine **11** (DMSO- $d_6$ , 30 °C).

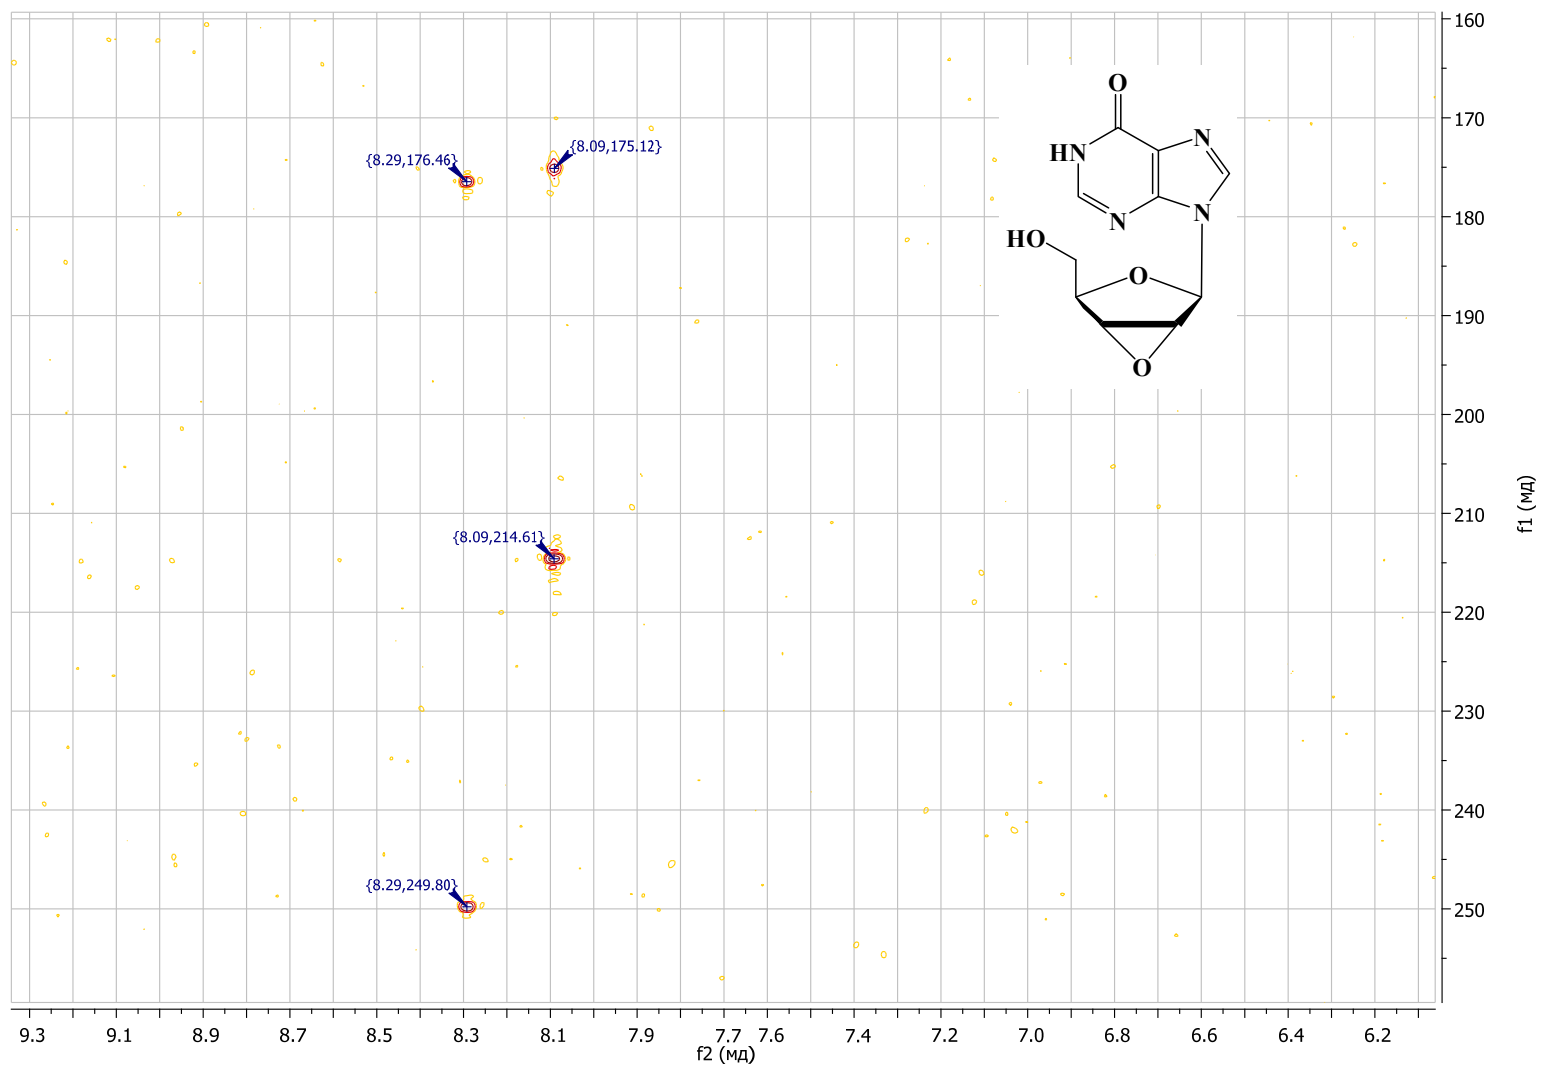

The fragment of  $^1\text{H}$ - $^{15}\text{N}$ -HMBC NMR spectrum of 2',3'-anhydroinosine **11** (DMSO- $d_6$ , 30 °C)

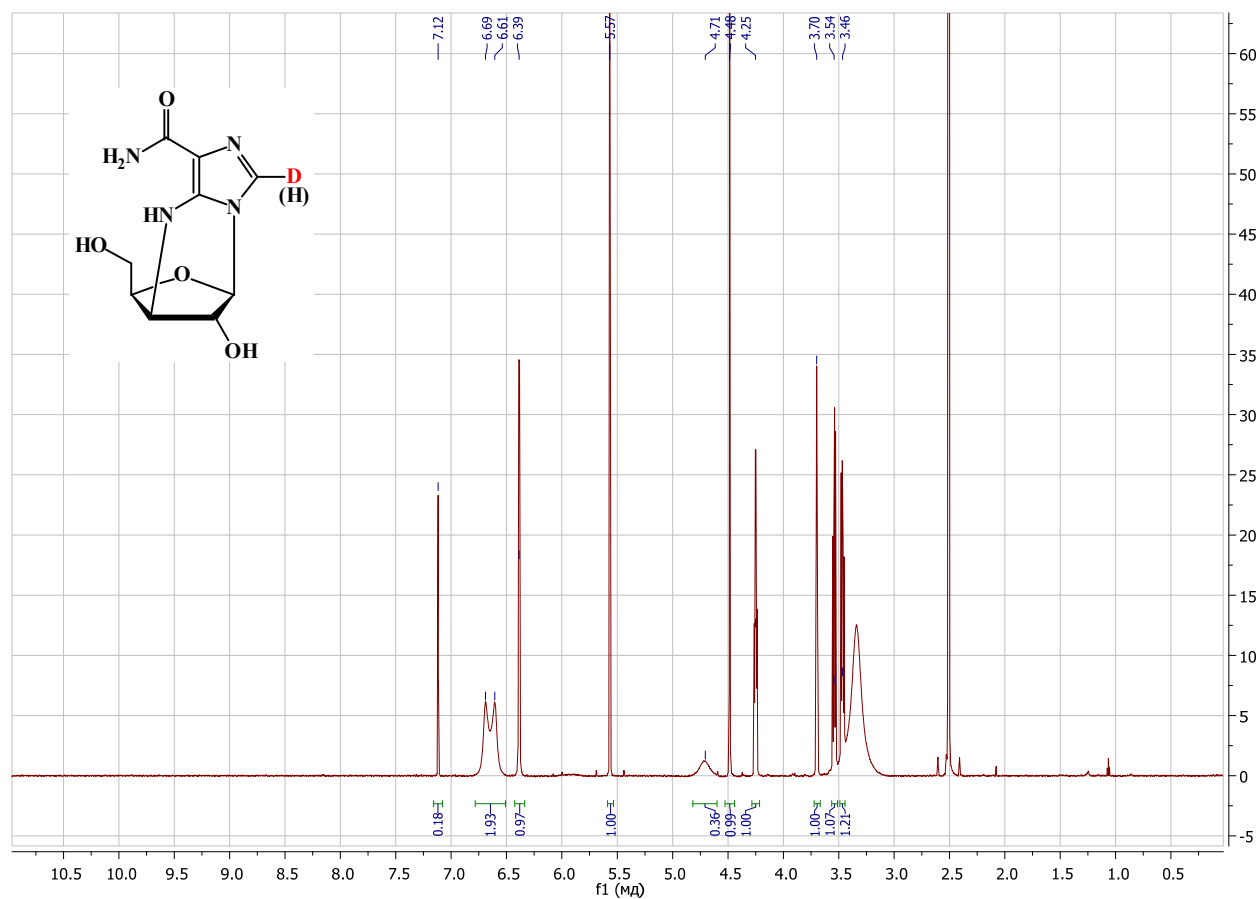

The <sup>1</sup>H NMR spectrum of compound 10 (DMSO-d<sub>6</sub>, 30 °C).

<sup>1</sup>H NMR (700 MHz, DMSO-d<sub>6</sub>, 30 °C):  $\delta$  = 7.12 (s, 0.18 H, H-8), 6.69 and 6.61 (2 s, 2 H, CONH<sub>2</sub>), 6.39 (d,  $J$  = 4.4 Hz, 1 H, NH), 5.57 (d,  $J$  < 0.5 Hz, 1H, H-1'), 4.71 (br. sign, 0.36 H, OH-5'), 4.48 (br. sign, 1H, H-2'), 4.25 (dt,  $J$  = 3.2, 6.6, 6.6 Hz, 1 H, H-4'), 3.70 (m, 1 H, H-3'), 3.54 (dd,  $J$  = 7.0, 11.3 Hz, 1 H, CH-5'a), 3.46 ppm (dd,  $J$  = 6.5, 11.3 Hz, 1 H, CH-5'b).

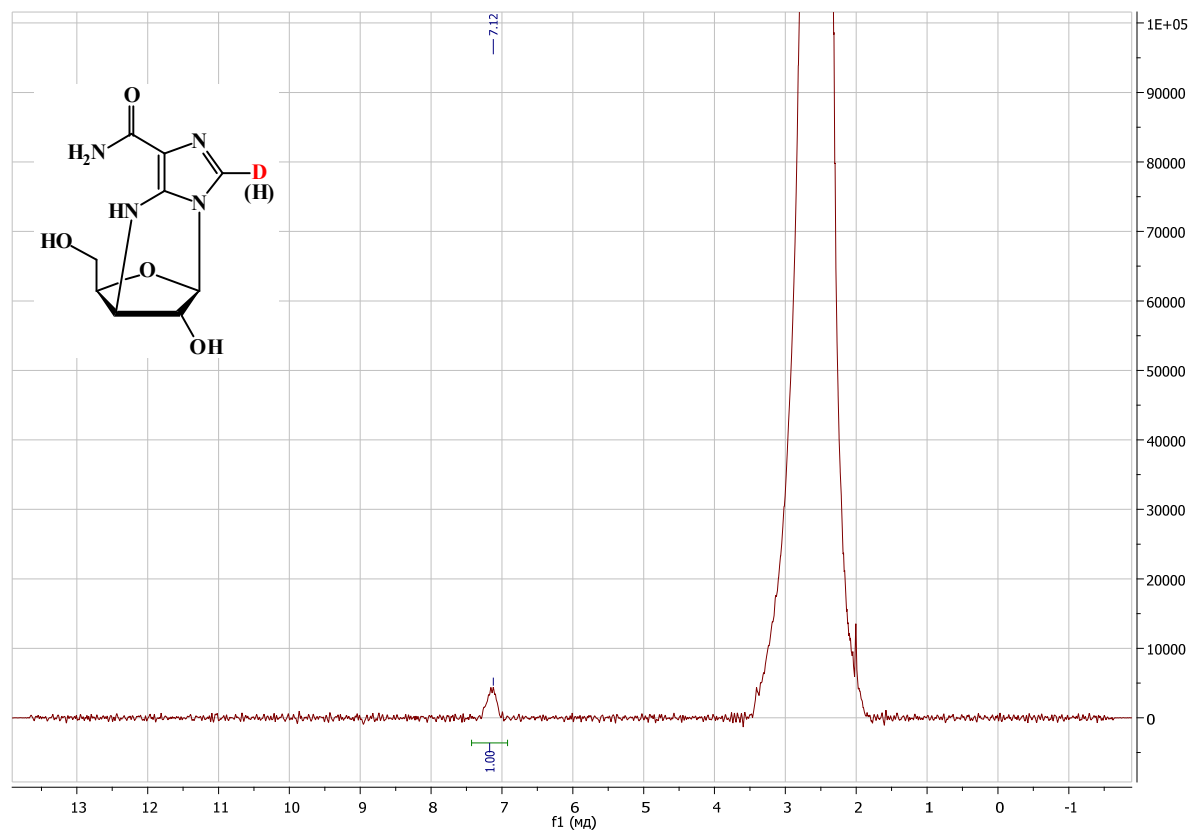

The  $^2\text{H}$  NMR spectrum of compound **10** ( $\text{DMSO-d}_6$ ,  $30\text{ }^\circ\text{C}$ )

$^2\text{H}$  NMR (700 MHz,  $\text{DMSO-d}_6$ ,  $30\text{ }^\circ\text{C}$ ):  $\delta = 7.12$  ppm (s, D-8).

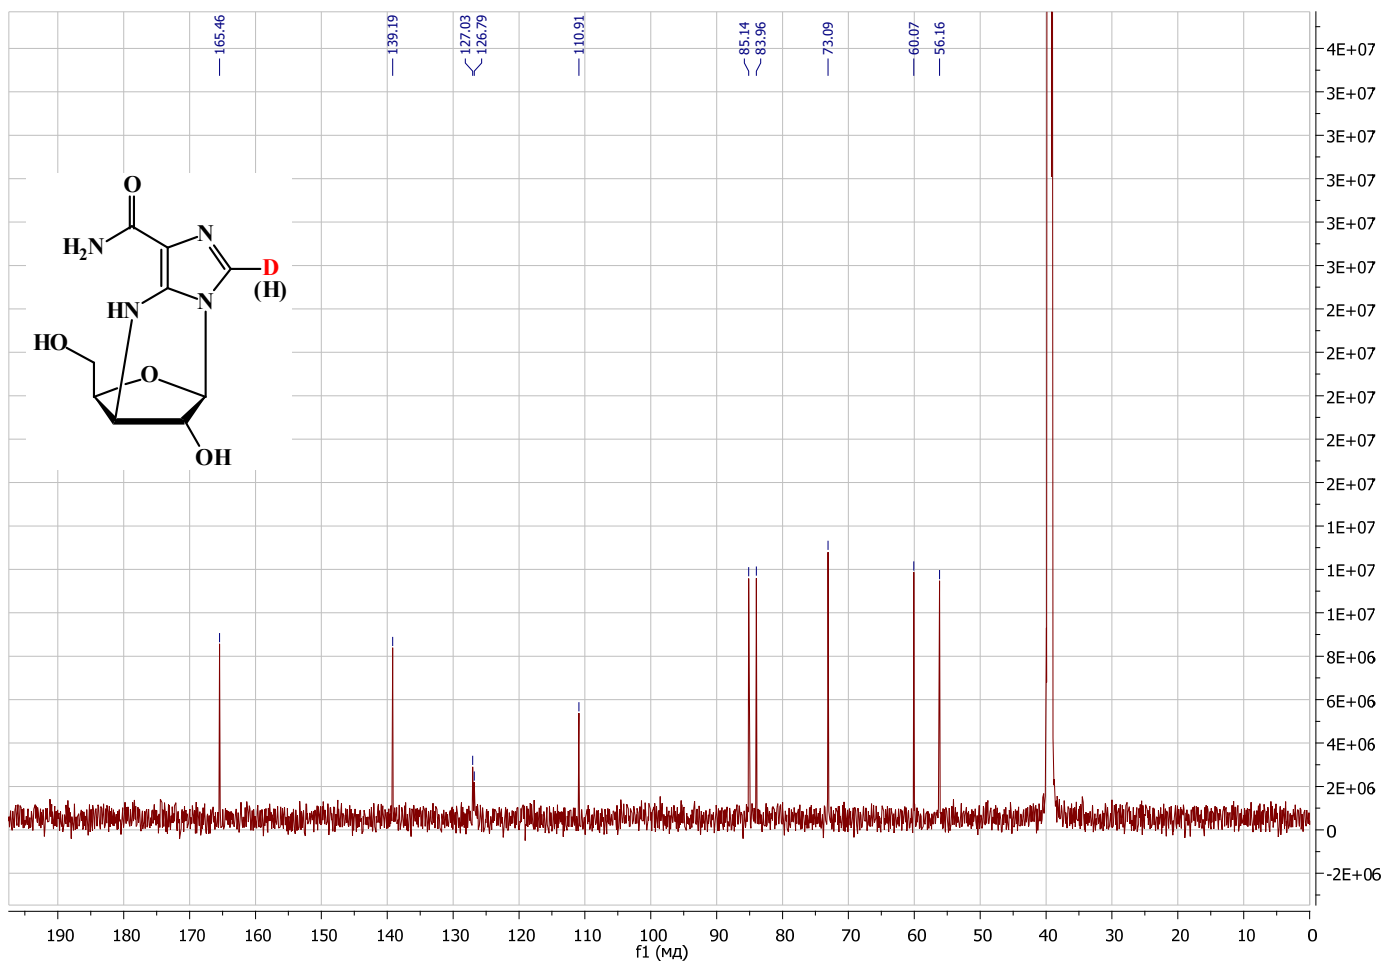

The <sup>13</sup>C NMR spectrum of compound **10** (DMSO-d<sub>6</sub>, 30 °C).

<sup>13</sup>C NMR (176 MHz, DMSO-d<sub>6</sub>, 30 °C):  $\delta$  = 165.46 (C=O), 139.19 (C5), 127.03(C2), 126.79 (t,  $J$  = 18.5 Hz, C2-D), 110.91 (C4), 85.14 (C4'), 83.96 (C1'), 73.09 (C2'), 60.07 (C5'), 56.16 ppm (C3').



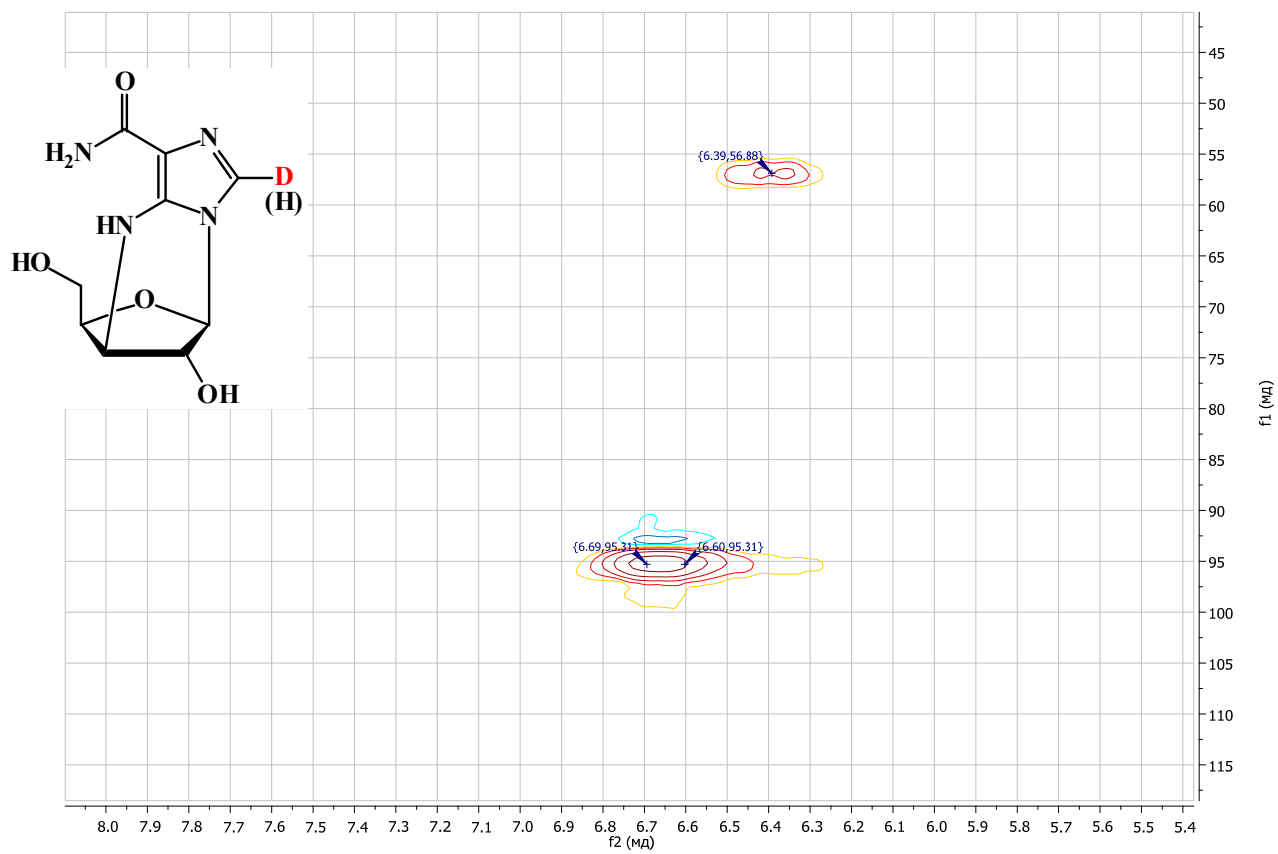

The fragment of  $^1\text{H}$ - $^{15}\text{N}$ -HSQC NMR spectrum of nucleoside **10** (DMSO- $d_6$ , 30  $^\circ\text{C}$ ).

$^{15}\text{N}$  NMR (71 MHz, DMSO- $d_6$ , 30  $^\circ\text{C}$ ):  $\delta$  = 253.35 (N3), 177.94 (N1), 95.31 (NH<sub>2</sub>), 56.88 ppm (NH).

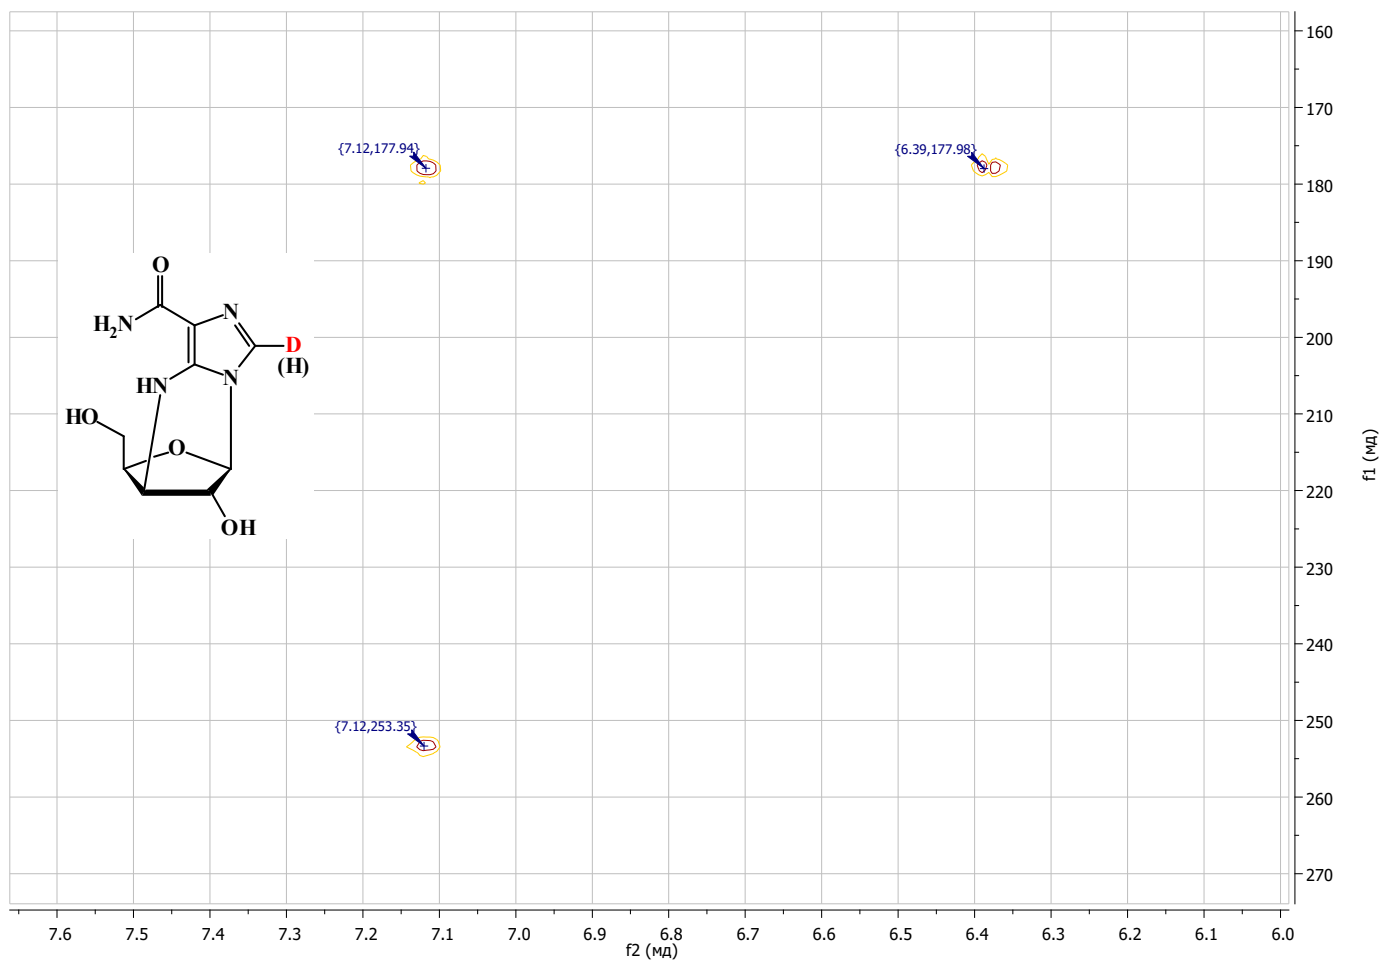

The fragment of  $^1\text{H}$ - $^{15}\text{N}$ -HMBC NMR spectrum of nucleoside **10** (DMSO- $d_6$ , 30 °C).

$^{15}\text{N}$  NMR (71 MHz, DMSO- $d_6$ , 30 °C):  $\delta$  = 253.35 (N3), 177.94 (N1), 95.31 ( $\text{NH}_2$ ), 56.88 ppm (NH).

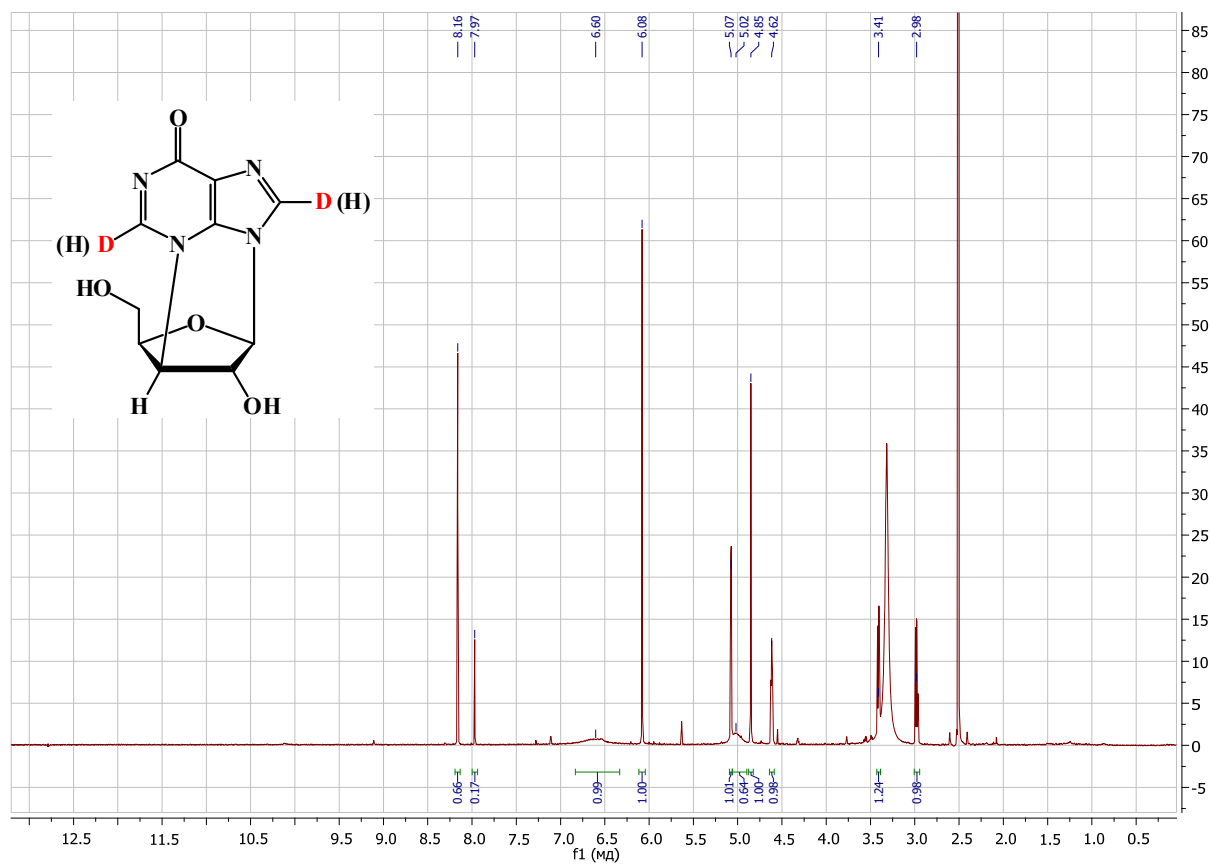

The  $^1\text{H}$  NMR spectrum of compound **12** (DMSO- $d_6$ , 30  $^\circ\text{C}$ ).

$^1\text{H}$  NMR (700 MHz, DMSO- $d_6$ , 30  $^\circ\text{C}$ ):  $\delta$  = 8.16 (s, 0.66 H, H-8), 7.97 (s, 0.18 H, H-2), 6.08 (1H, d,  $J$  < 1 Hz, H-1'), 5.07 (d,  $J$  = 3.1 Hz, 1 H, H-3'), 4.85 (m, 1 H,  $J$  < 1 Hz, H-2'), 4.62 (ddd,  $J$  = 3.4, 6.1, 7.5 Hz, 1 H, H-4'), 3.41 (dd,  $J$  = 6.1, 11.1 Hz, 1 H, CH-5'<sup>a</sup>), 2.98 ppm (dd,  $J$  = 7.6, 11.1 Hz, 1 H, CH-5'<sup>b</sup>).

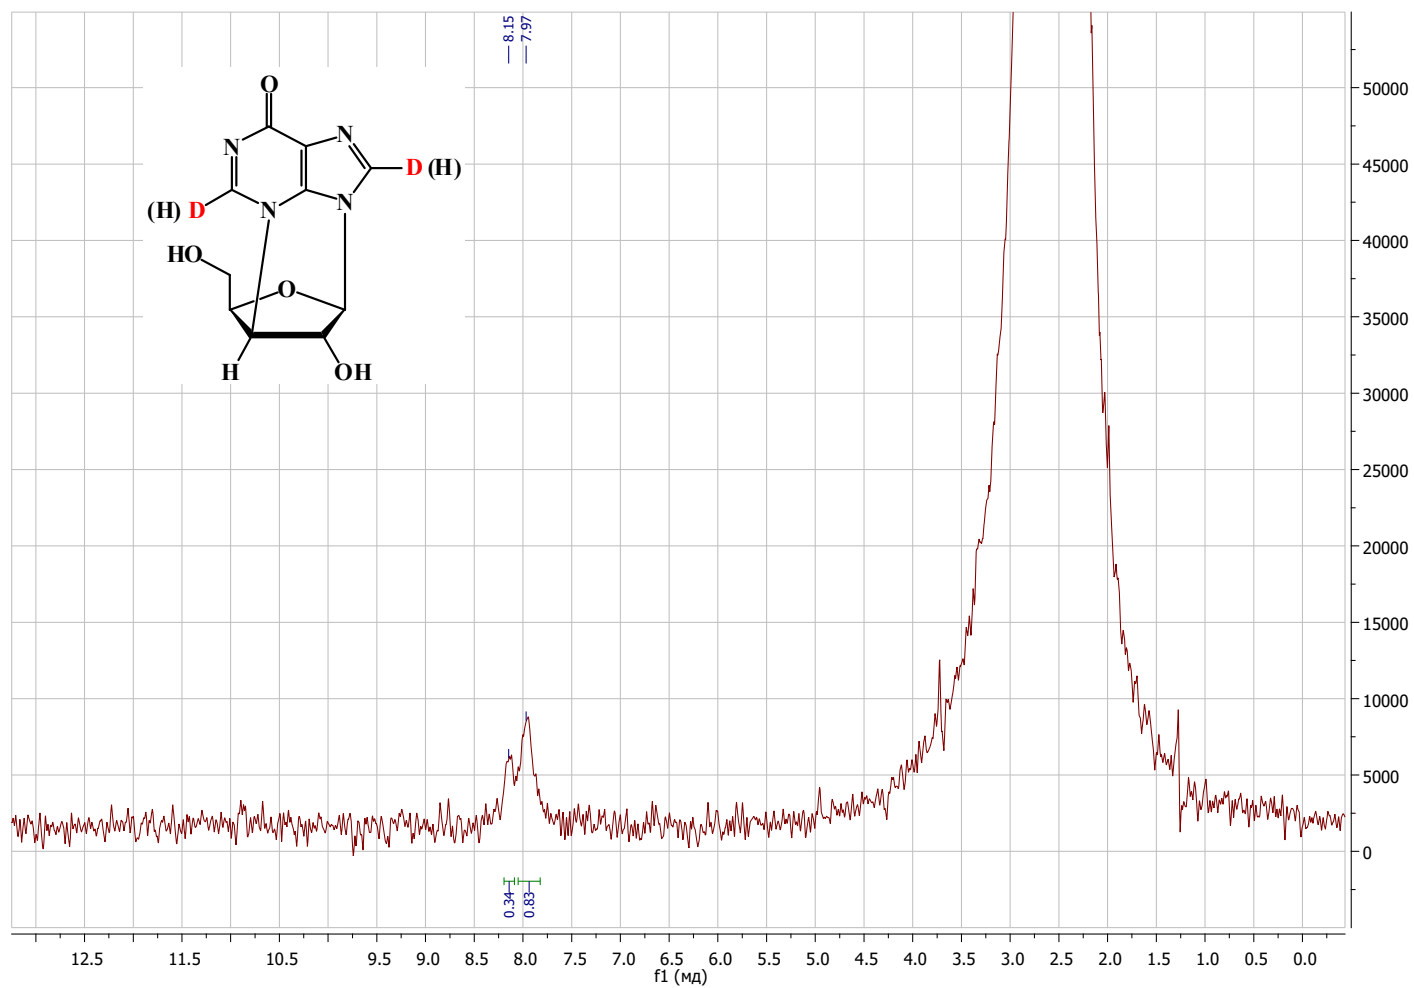

The  $^2\text{H}$  NMR spectrum of compound 12 (DMSO- $d_6$ , 30 °C).

$^2\text{H}$  NMR (700 MHz, DMSO- $d_6$ , 30 °C):  $\delta$  = 8.16 (s, 0.34 H, D-8), 7.97 ppm (s, 0.82 H, D-2).

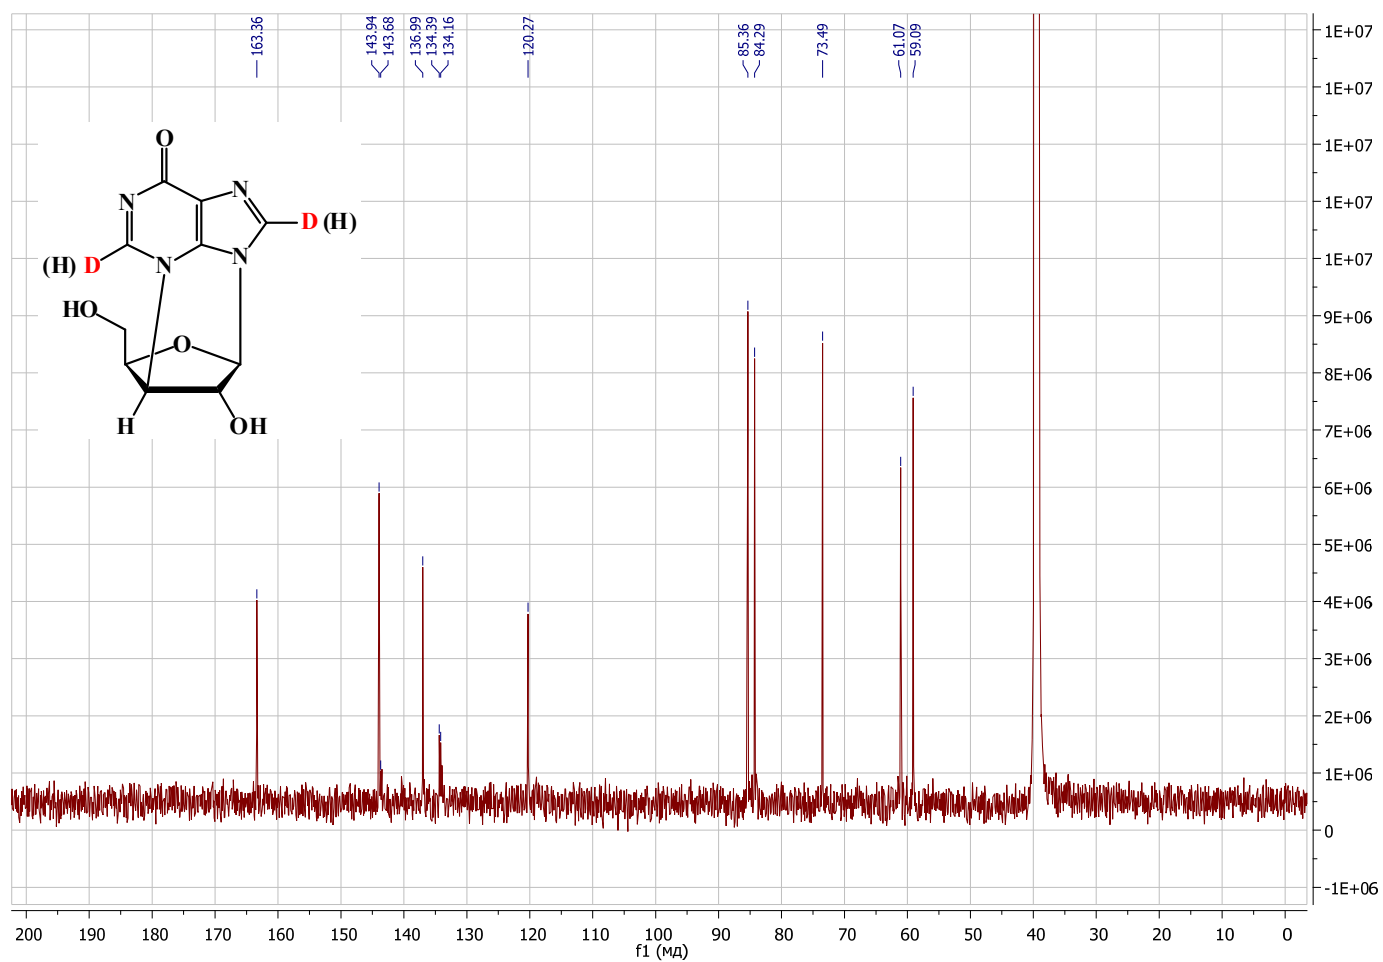

The <sup>13</sup>C NMR spectrum of compound 12)(DMSO-d<sub>6</sub>, 30 °C).

<sup>13</sup>C NMR (176 MHz, DMSO-d<sub>6</sub>, 30 °C):  $\delta$  = 163.36 (C=O), 143.94 (C2), 136.99 (C4), 134.39 (C8), 134.16 (t,  $J$  = 38 Hz, C8-D), 120.27 (C5), 85.36 (C1'), 84.29 (C4'), 73.49 (C2'), 61.07 (C3'), 59.09 ppm (C5').

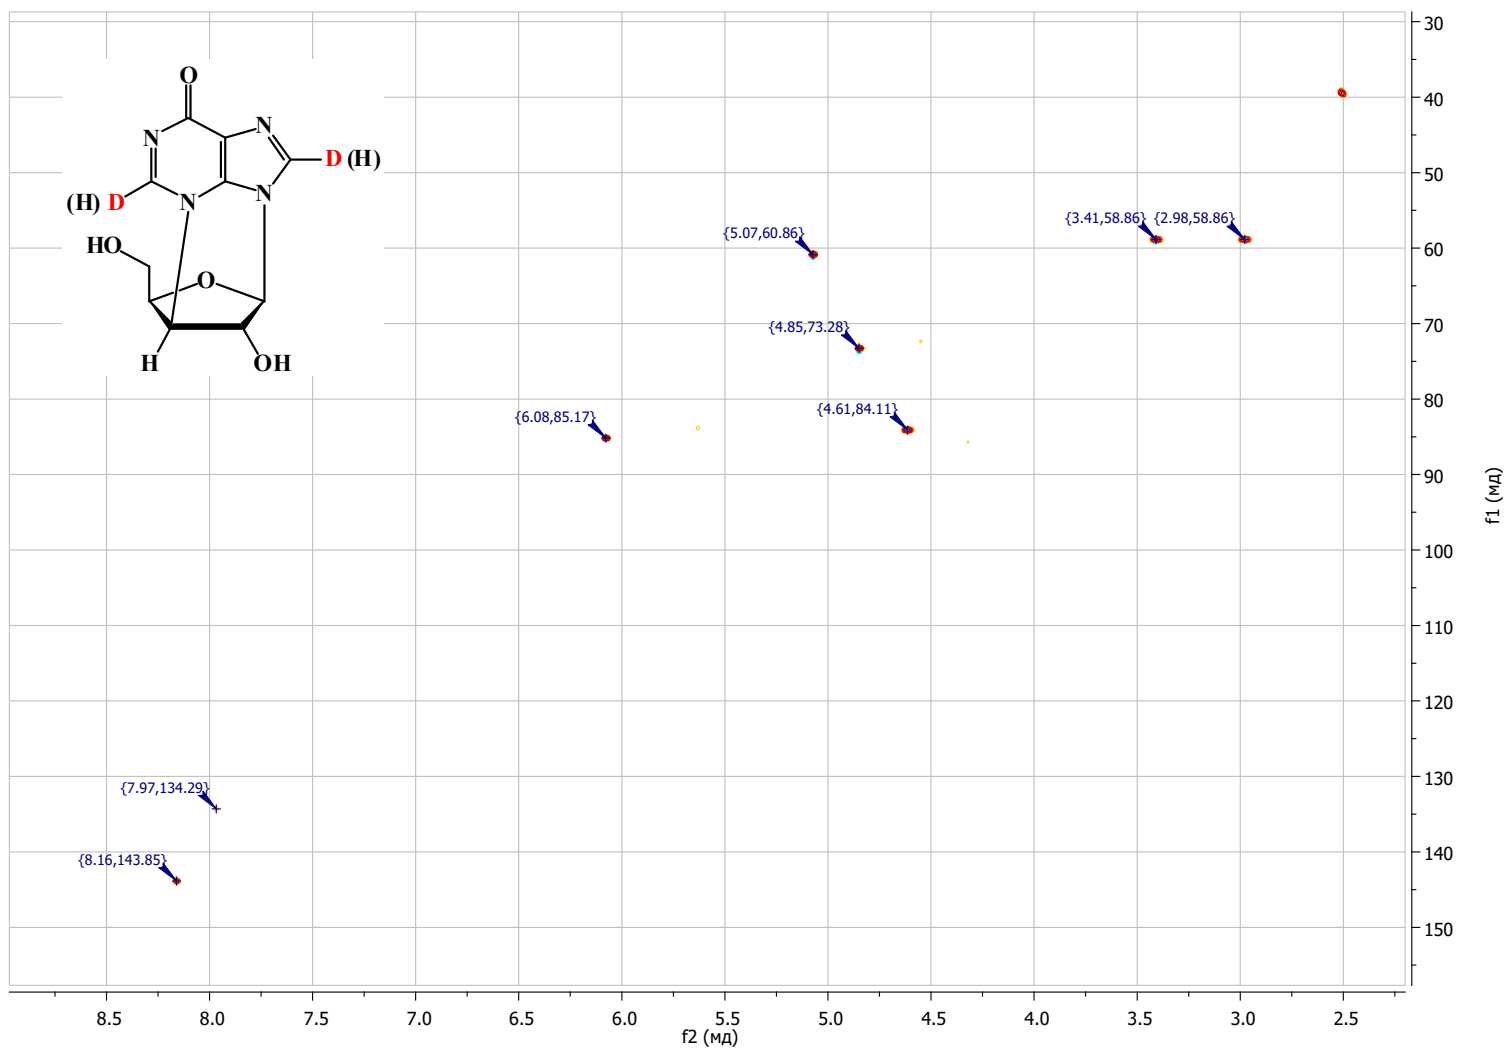

The fragment of  $^1\text{H}$ - $^{13}\text{C}$ -HSQC NMR spectrum of nucleoside 12 (DMSO- $d_6$ , 30 °C).

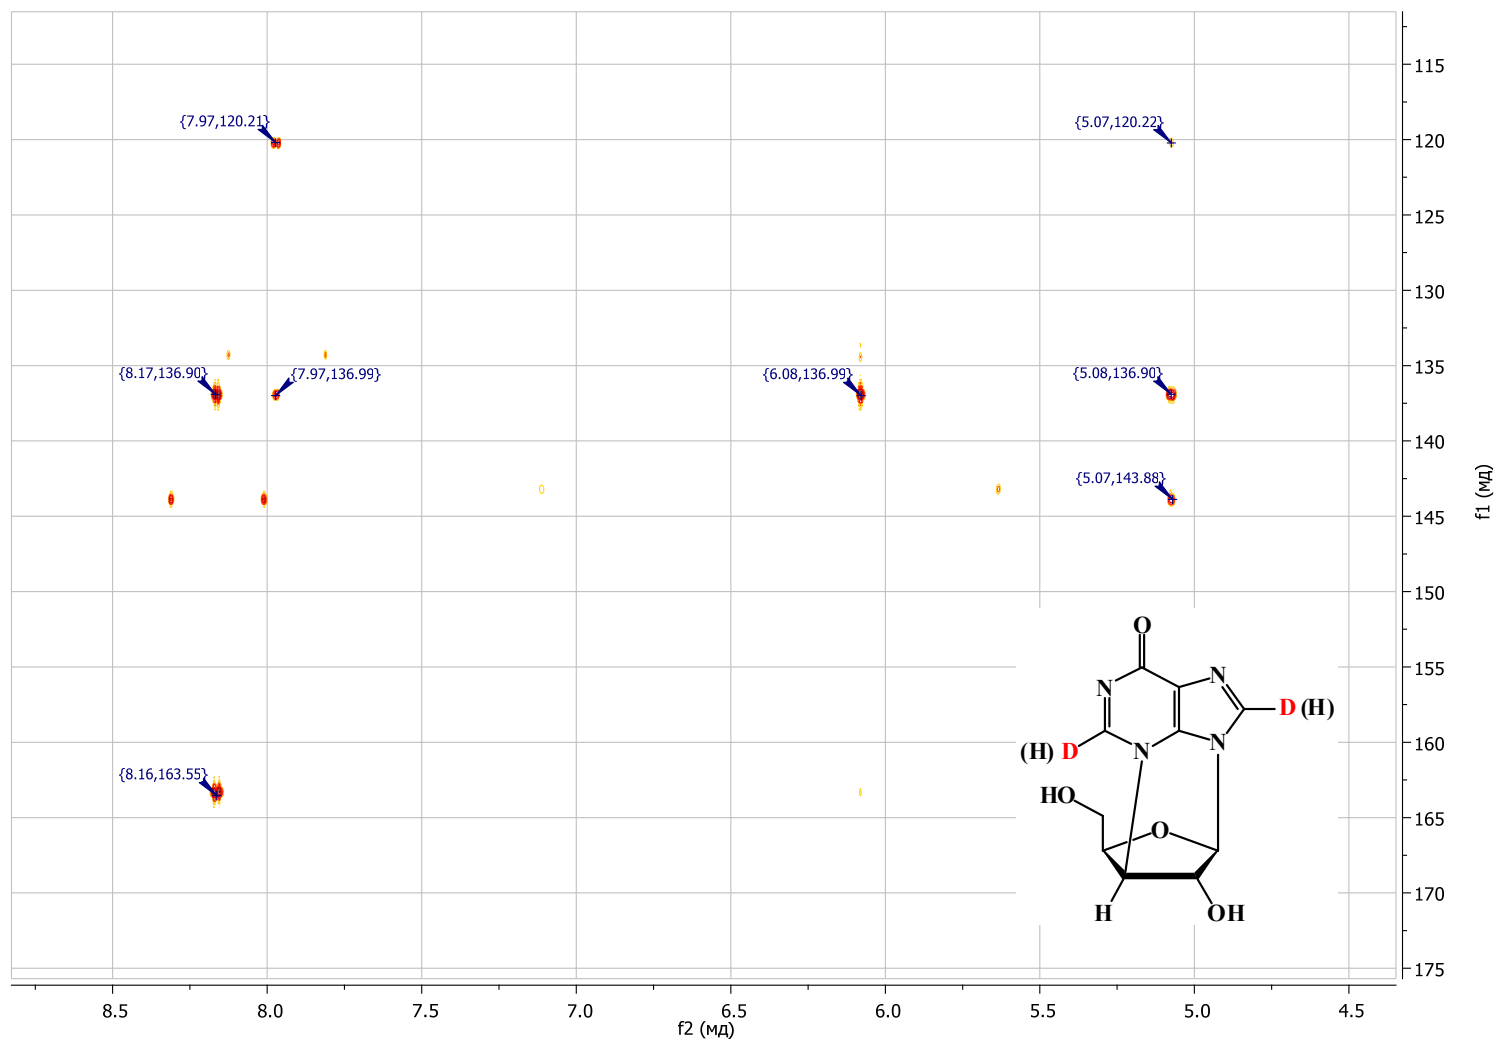

The fragment of  $^1\text{H}$ - $^{13}\text{C}$ -HMBC NMR spectrum of nucleoside **12** (DMSO- $d_6$ , 30 °C).

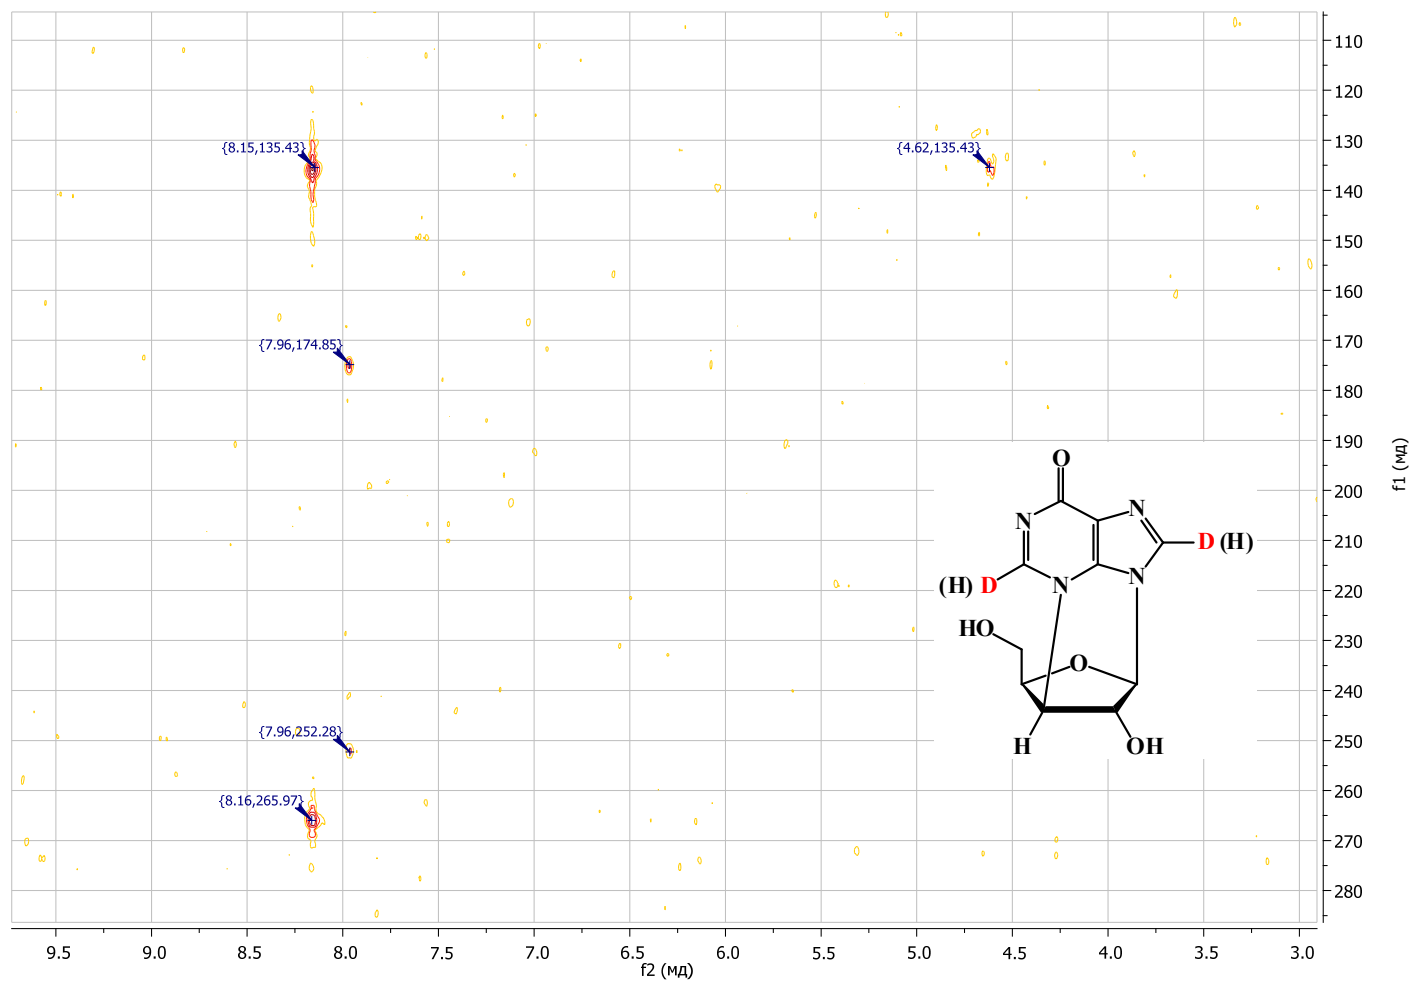

The fragment of  $^1\text{H}$ - $^{15}\text{N}$ -HMBC NMR spectrum of nucleoside **12** (DMSO- $d_6$ , 30 °C).

$^{15}\text{N}$  NMR (71 MHz, DMSO- $d_6$ , 30 °C):  $\delta$  = 265.97 (N1), 252.28 (N7), 174.85 (N9), 135.43 ppm (N3).



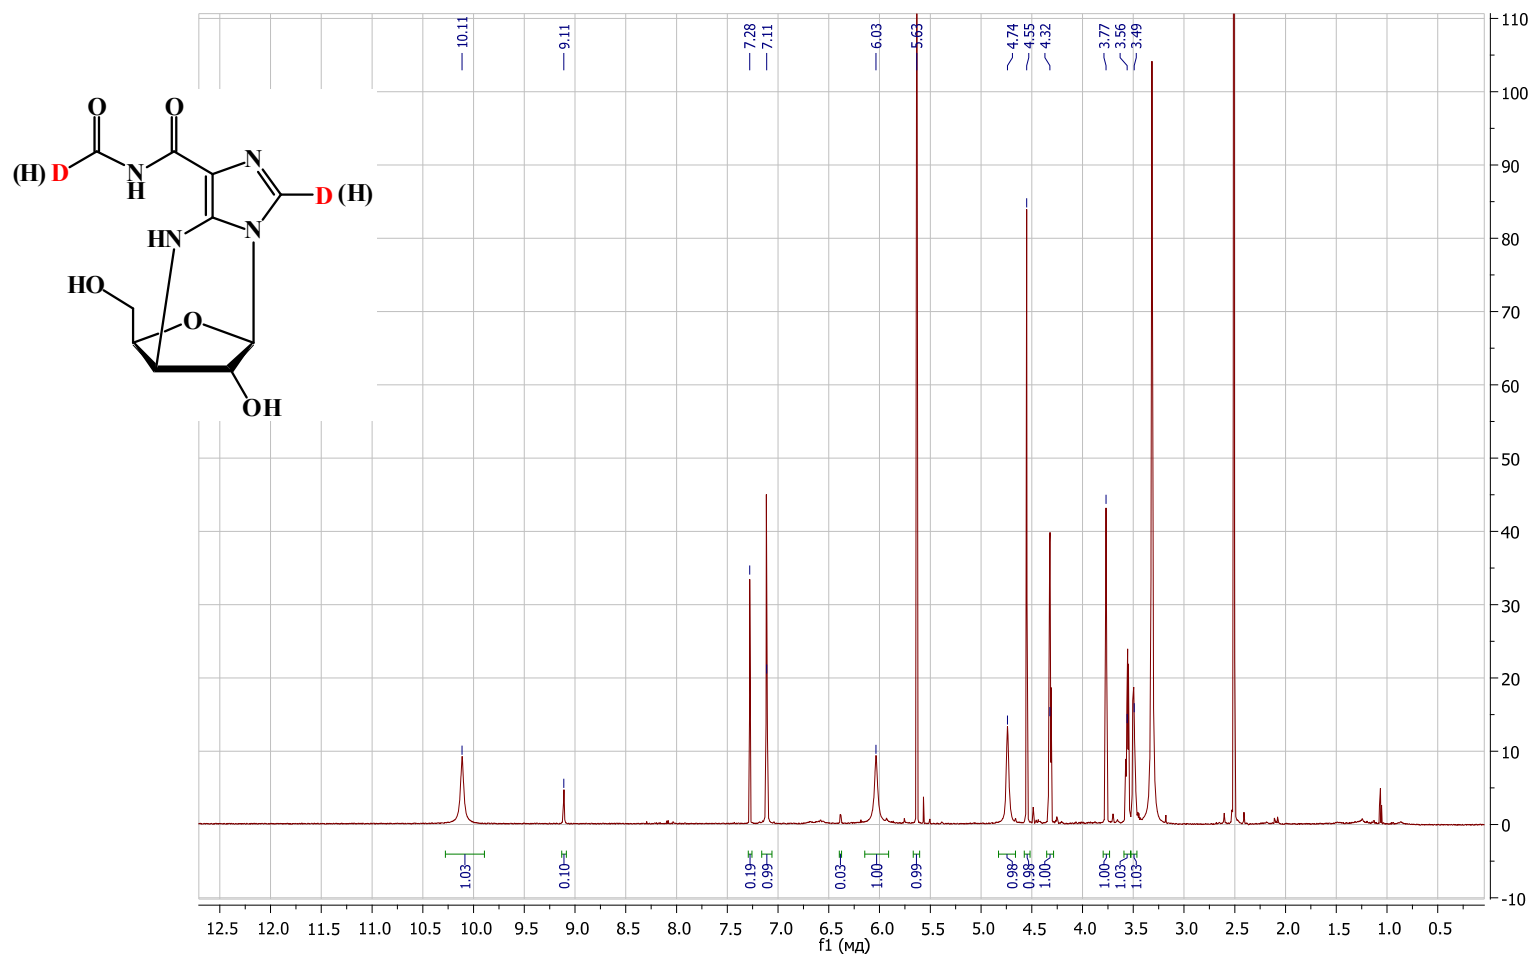

The <sup>1</sup>H NMR spectrum of compound 14 (DMSO-d<sub>6</sub>, 30 °C).

<sup>1</sup>H NMR (700 MHz, DMSO-d<sub>6</sub>, 30 °C):  $\delta$  = 10.11 (s, 1 H, CO-NH), 9.11 (s, 0.1 H, C(O)H), 7.28 (s, 0.19 H, H-2), 7.11 (d,  $J$  = 4.7 Hz, 1H, C5-NH), 6.03 (s, 1 H, OH-2'), 5.63 (br. d,  $J$  = 0.25 Hz, H-1'), 4.74 (br. sign, 1 H, OH-5'), 4.32 (dt,  $J$  = 3.3, 6.7, 6.7 Hz, 1 H, H-4'), 3.77 (m, 1 H, H-3'), 3.56 (dd,  $J$  = 6.7, 11.3 Hz, 1 H, H<sup>5'a</sup>), 3.49 ppm (dd,  $J$  = 6.9, 10.8 Hz, 1 H, H<sup>5'b</sup>).

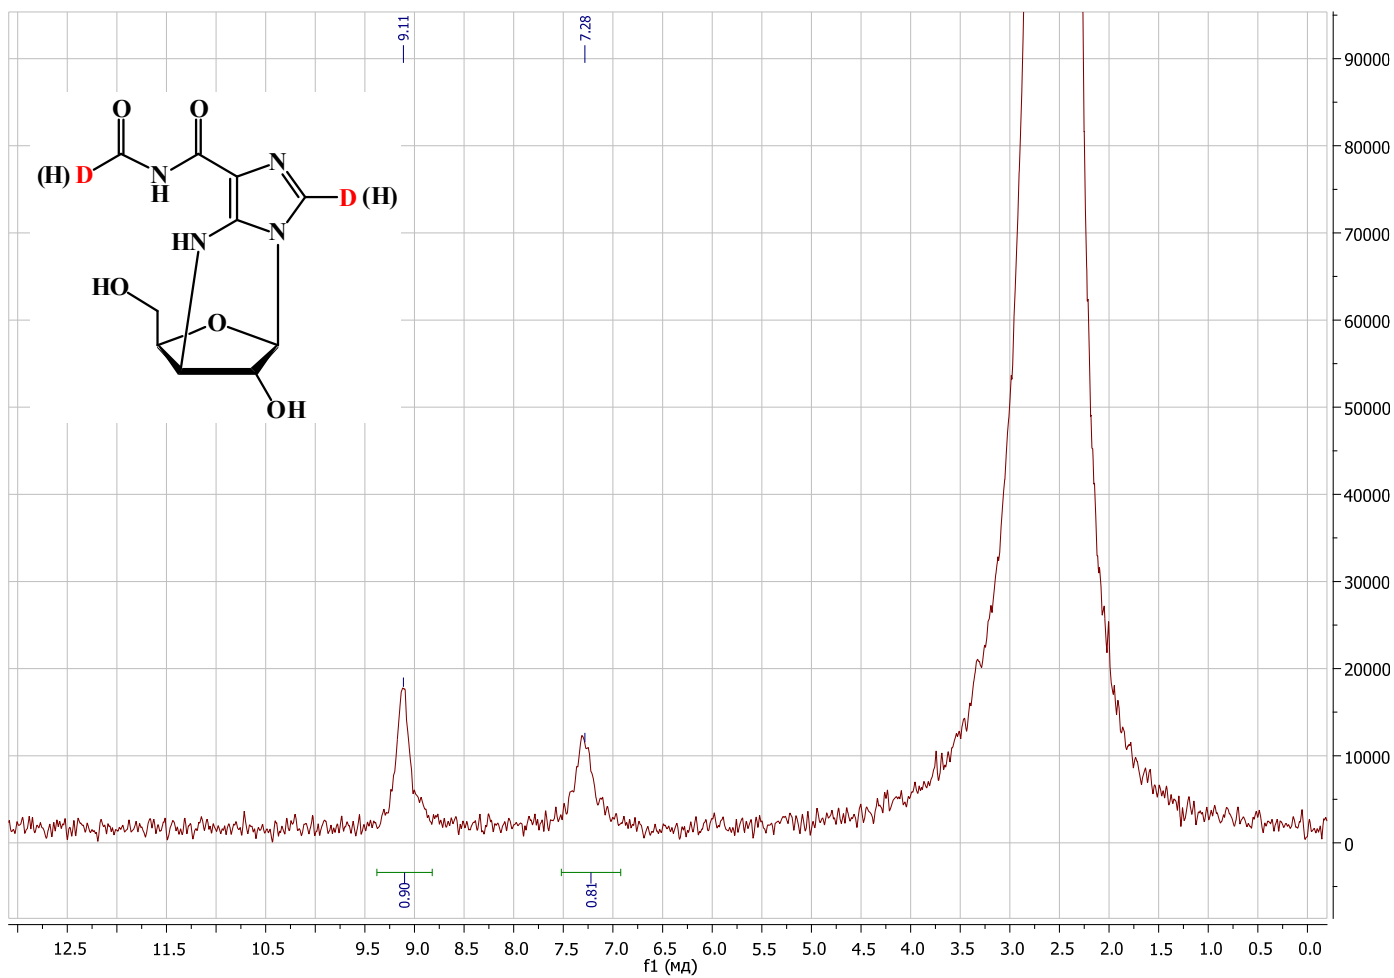

The  $^2\text{H}$  NMR spectrum of compound 14 (DMSO- $d_6$ , 30 °C).

$^2\text{H}$  NMR (700 MHz, DMSO- $d_6$ , 30 °C):  $\delta$  = 9.11 (s, 0.9 H, C(O)H), 7.28 ppm (s, 0.91 H, D-2).

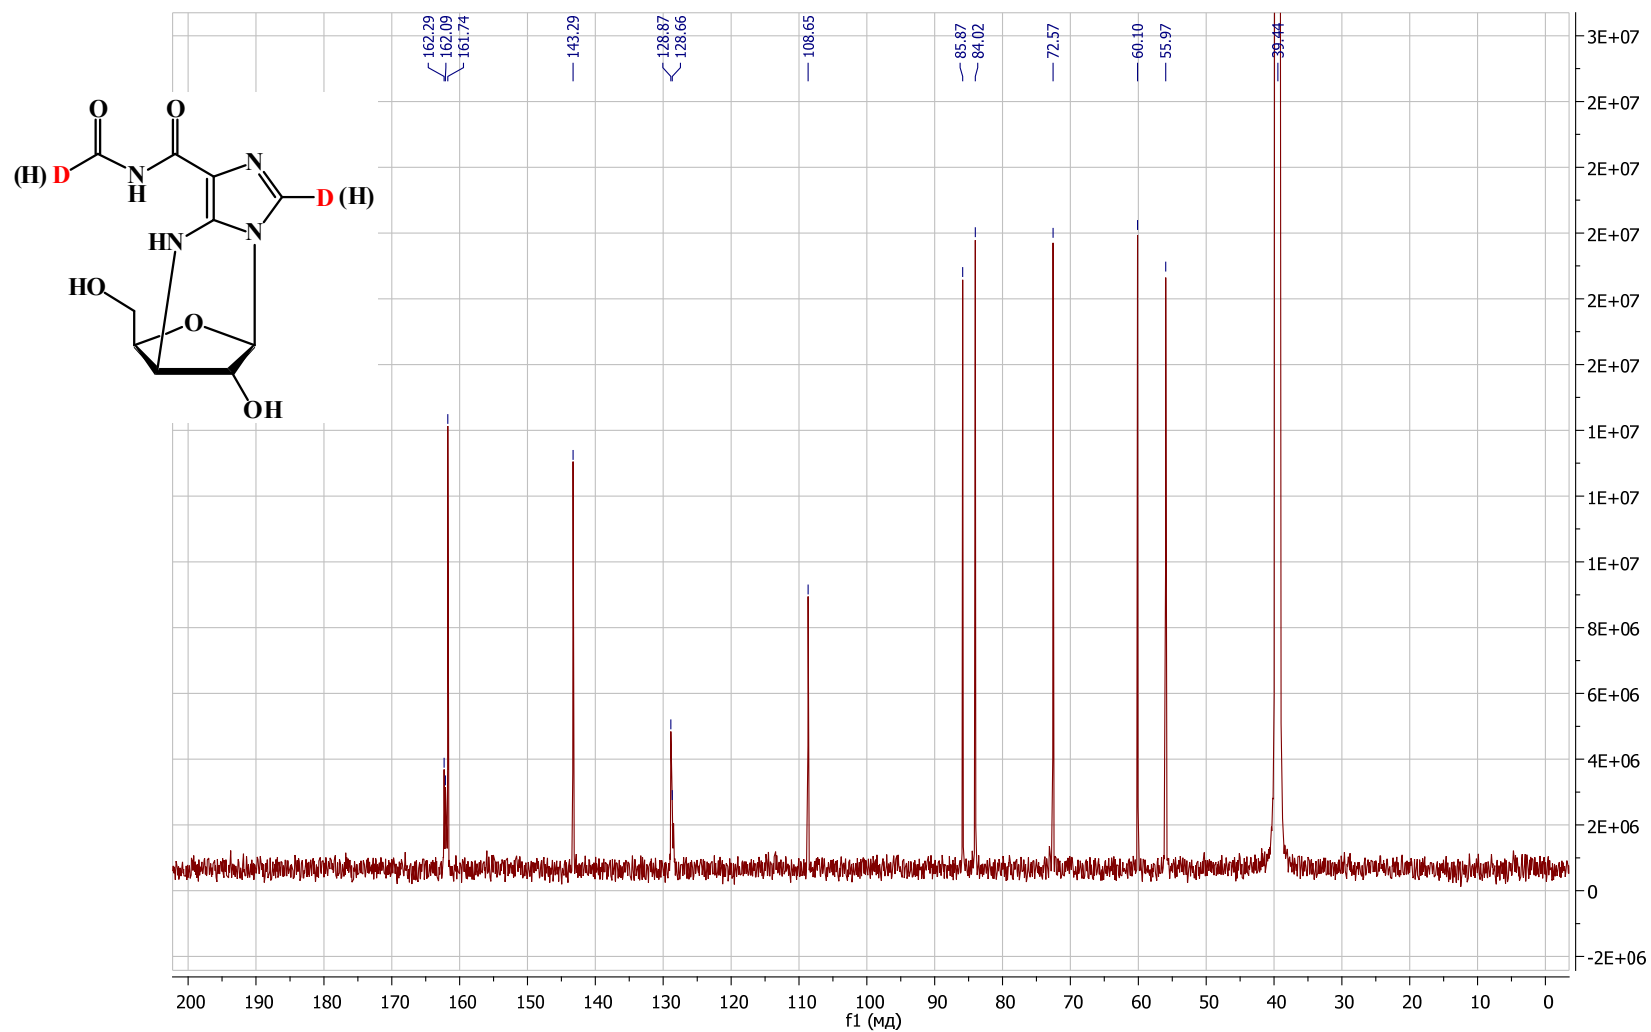

The  $^{13}\text{C}$  NMR spectrum of compound 14 (DMSO- $d_6$ , 30 °C).

$^{13}\text{C}$  NMR (176 MHz, DMSO- $d_6$ , 30 °C):  $\delta$  = 162.29 (s, 0.1C, (C=O)H), 162.09 (t,  $J$  = 30.1 Hz, 0.1C, (C=O)H), 161.74 (s, 1C, C=O), 143.29 (C5), 128.87 (s, 0.19C, C2-H), 128.66 (t,  $J$  = 33.2 Hz, 0.81C, C2-D), 108.65 (C4), 85.87 (C4'), 84.02 (C1'), 72.57 (C2'), 60.10 (C5'), 55.97 ppm (C3').

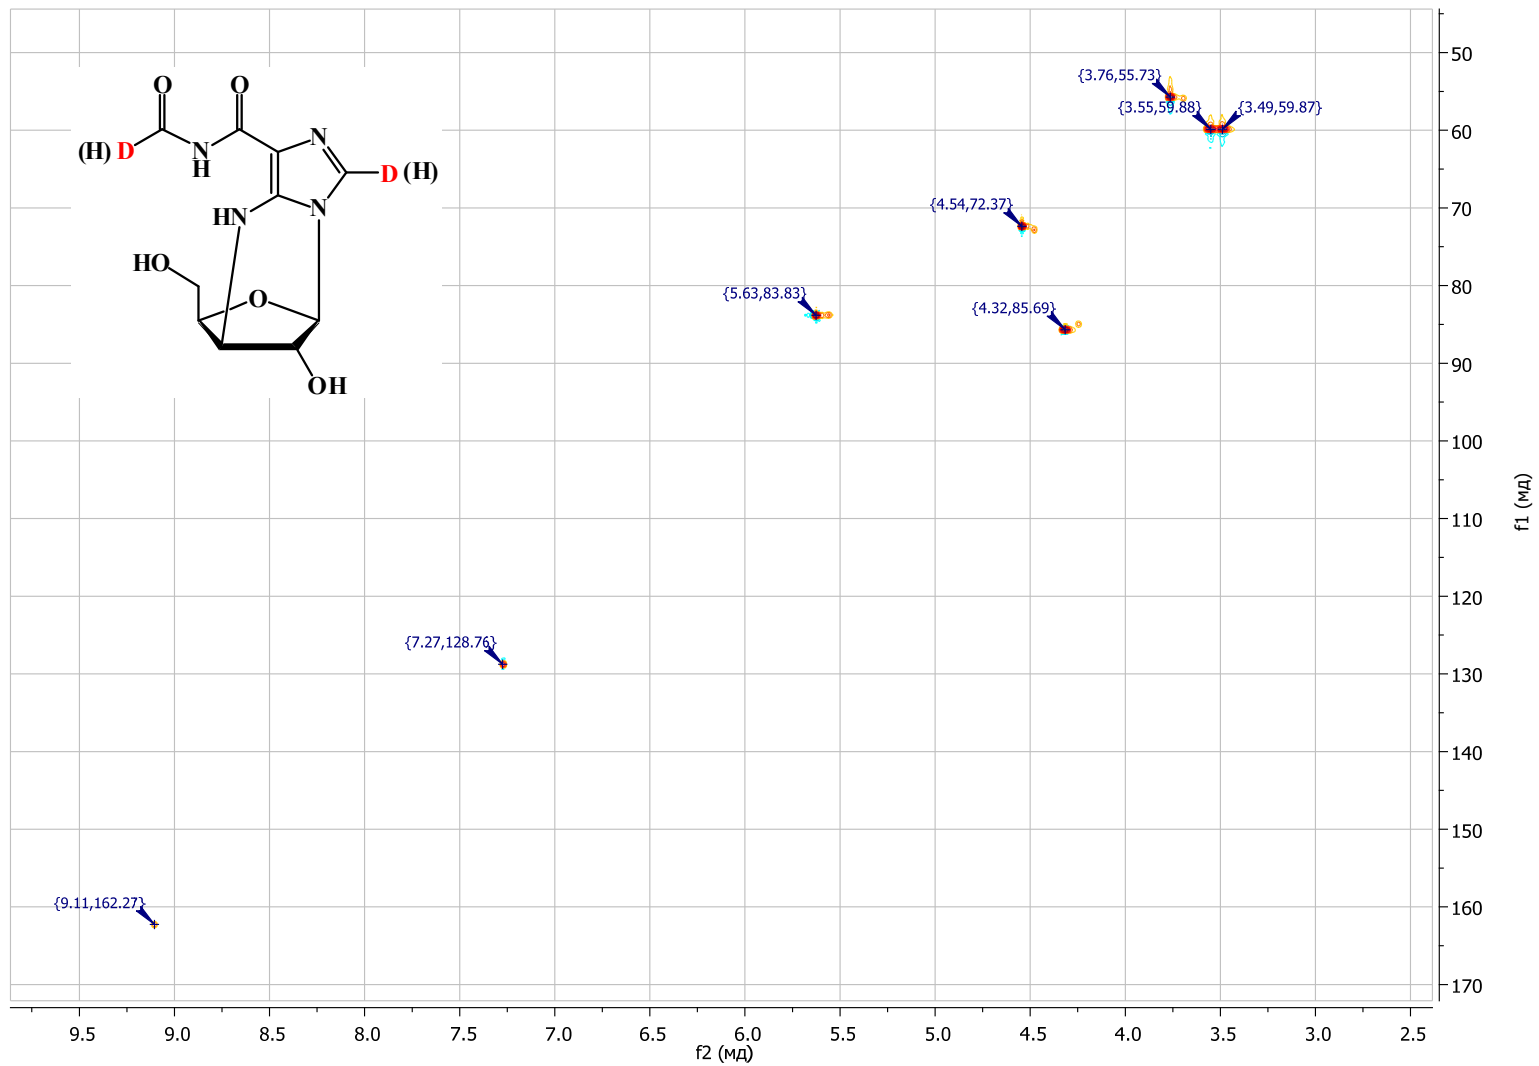

The fragment of  $^1\text{H}$ - $^{13}\text{C}$ -HSQC NMR spectrum of nucleoside 14 (DMSO- $d_6$ , 30  $^\circ\text{C}$ ).

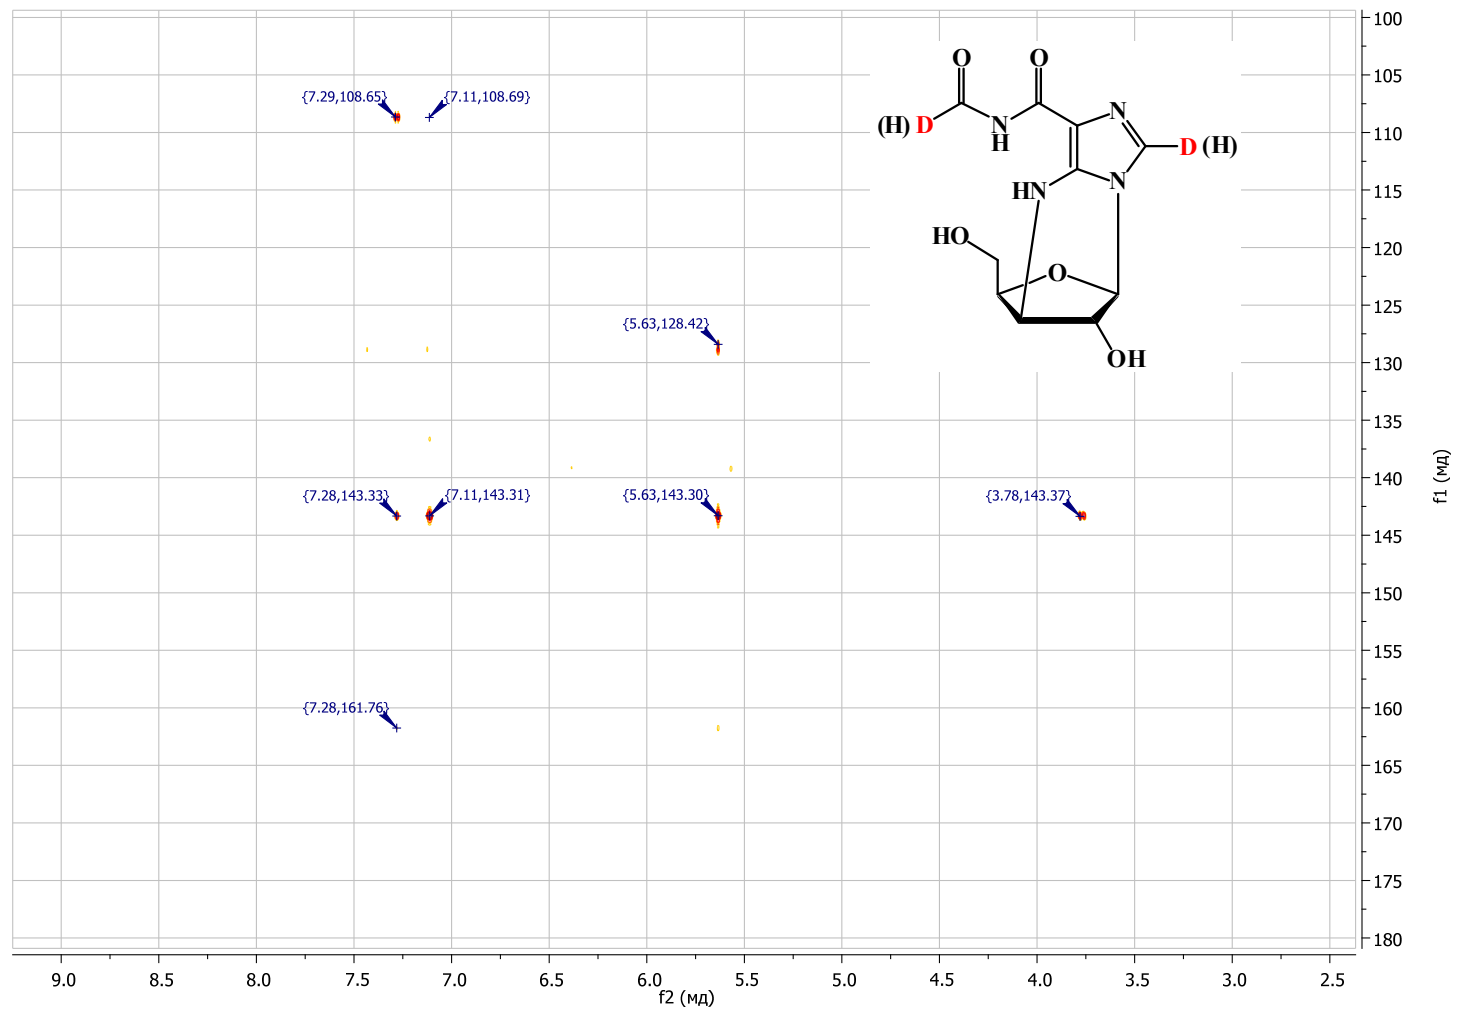

The fragment of  $^1\text{H}$ - $^{13}\text{C}$ -HMBC NMR spectrum of nucleoside 14 (DMSO- $d_6$ , 30 °C).

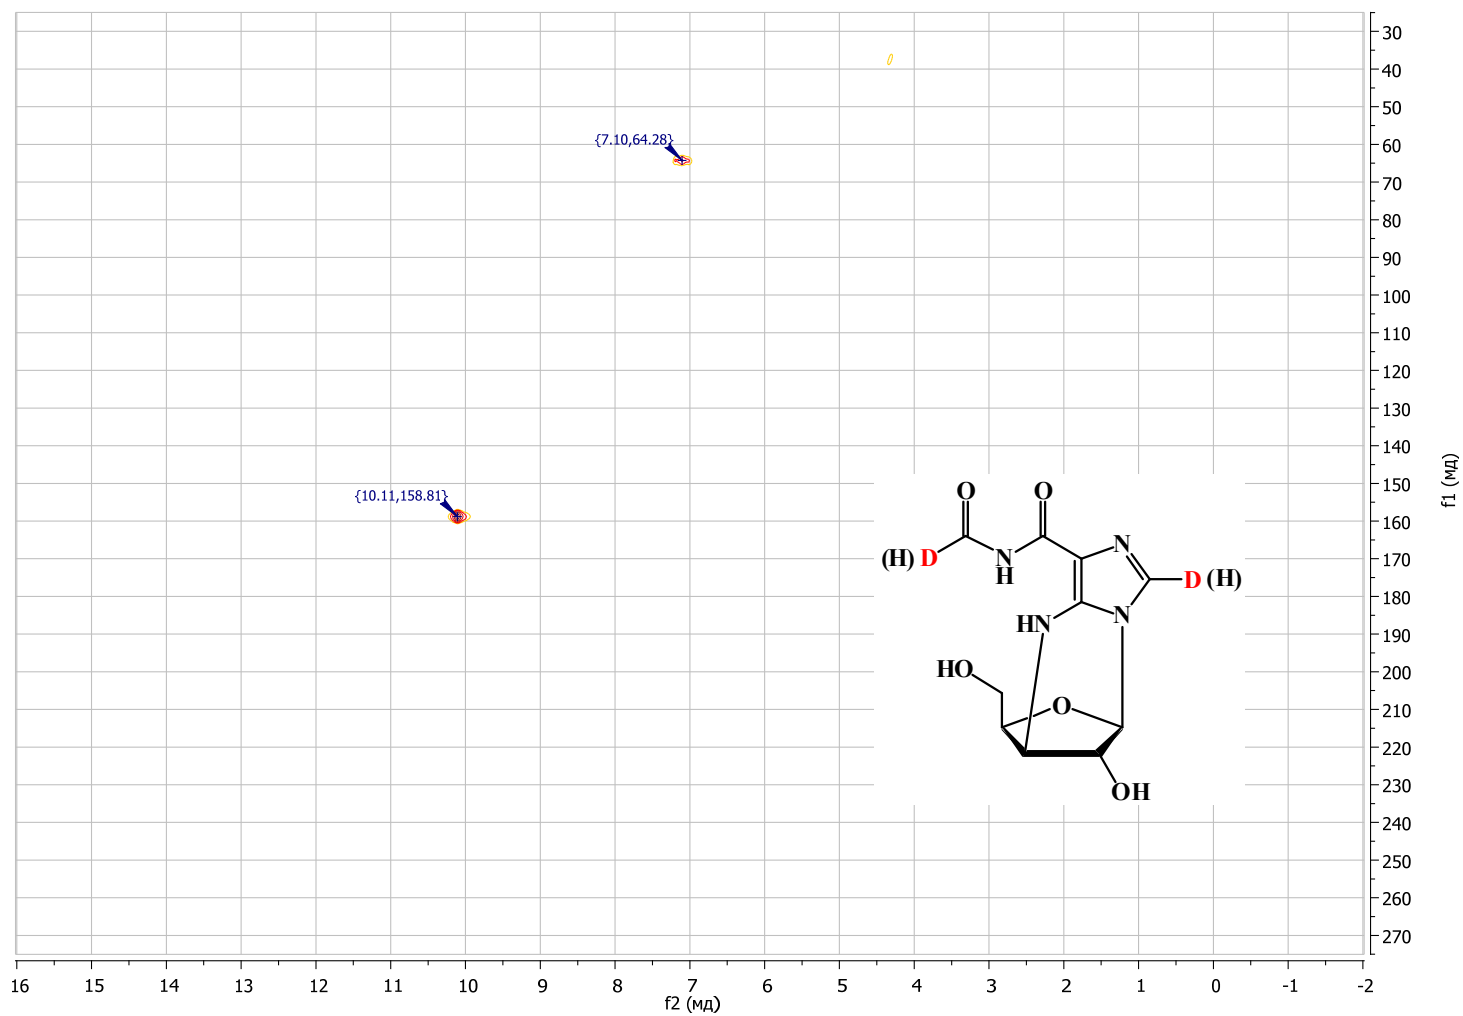

The fragment of  $^1\text{H}$ - $^{15}\text{N}$ -HSQC NMR spectrum of nucleoside 14 (DMSO- $d_6$ , 30 °C).

$^{15}\text{N}$  NMR (71 MHz, DMSO- $d_6$ , 30 °C):  $\delta$  = 250.33 (N3), 179.25 (N1), 158.81 (CO-NH), 64.28 ppm (C5-NH).

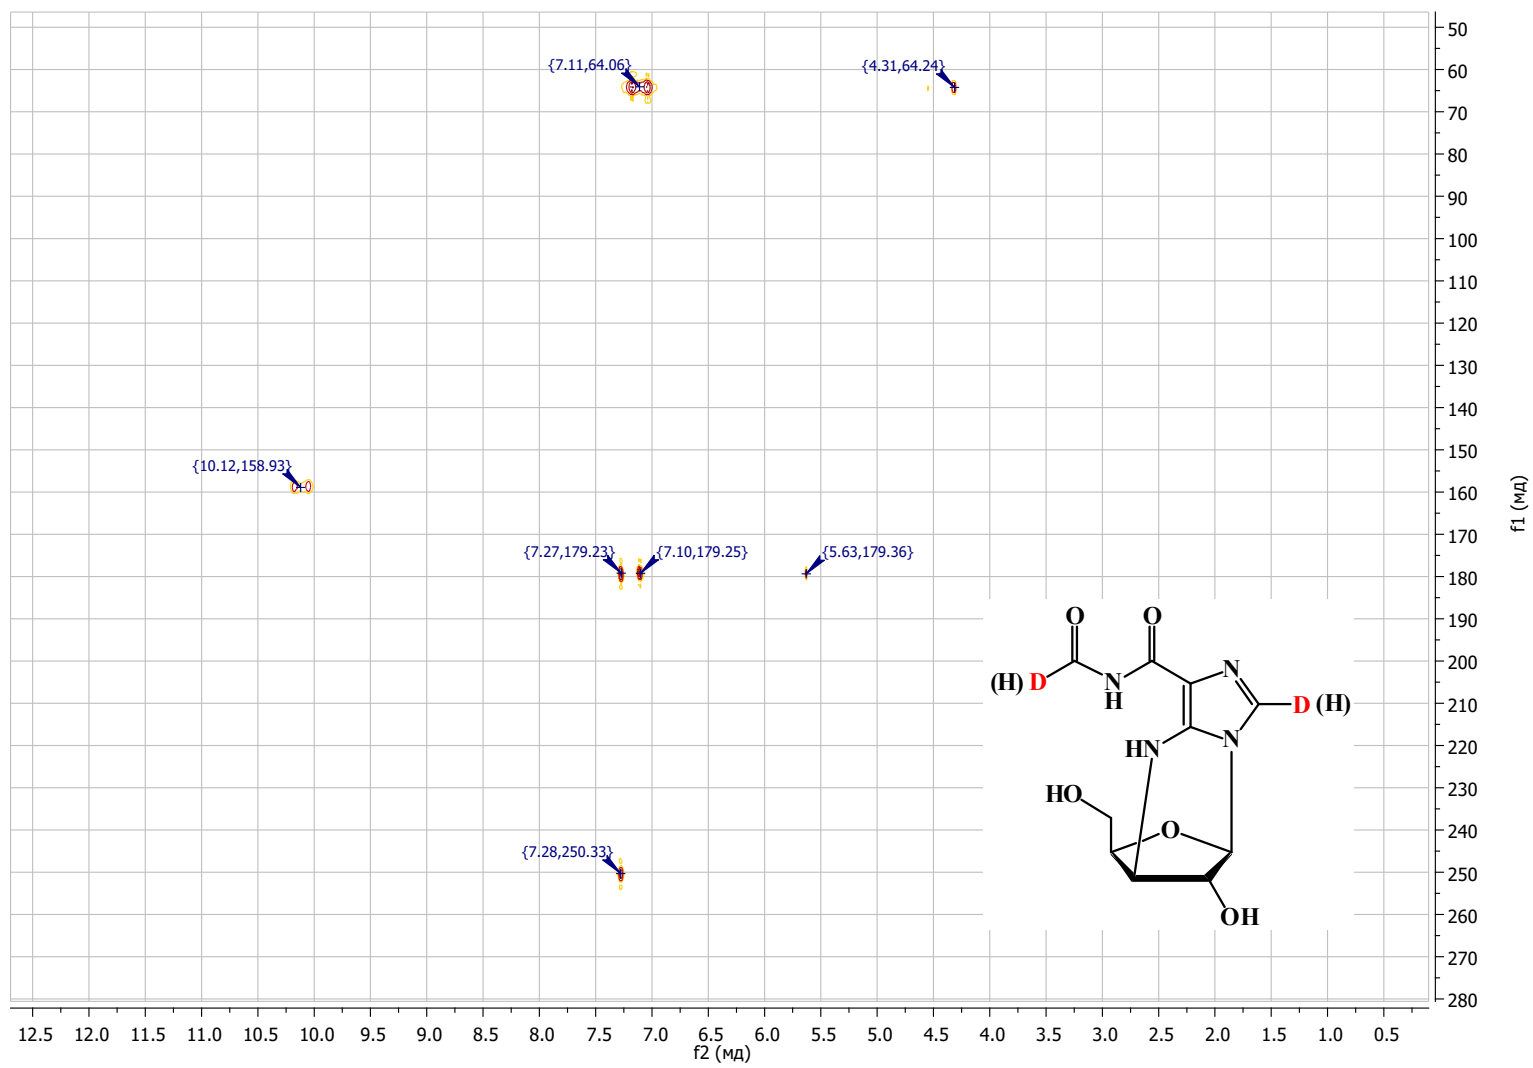

The fragment of  $^1\text{H}$ - $^{15}\text{N}$ -HMBC NMR spectrum of nucleoside 14 (DMSO- $d_6$ , 30 °C).

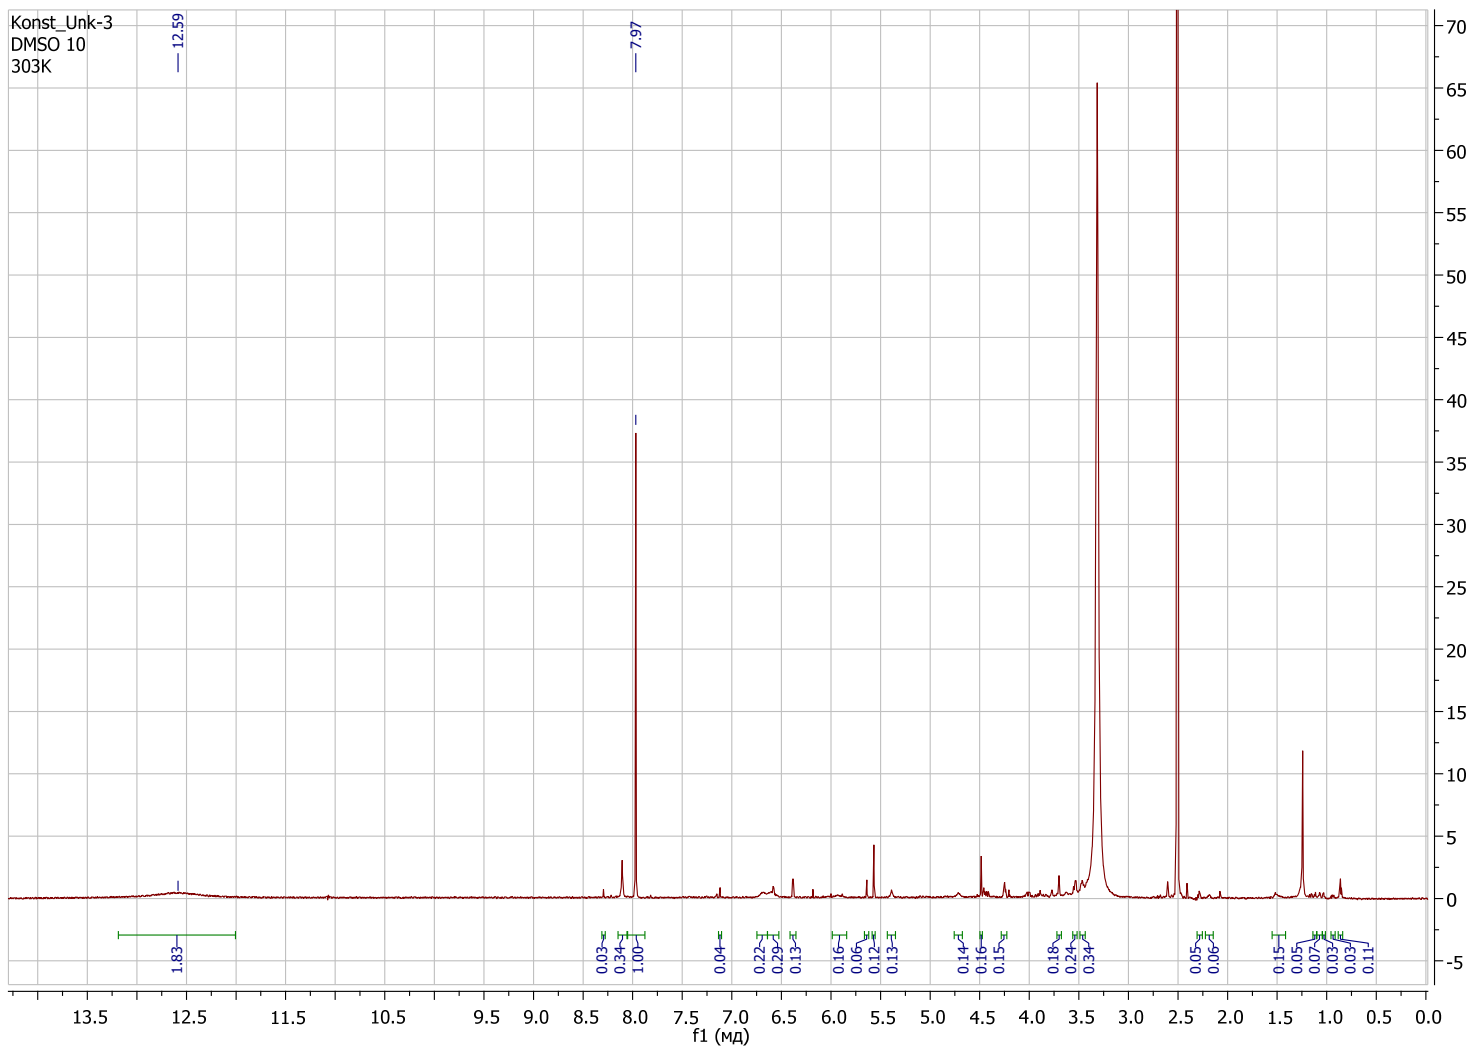

The  $^1\text{H}$  NMR spectrum of compound 13 (DMSO- $d_6$ , 30  $^\circ\text{C}$ ).
